# Supplementary material for: Pressure-induced phase transitions in a new luminescent gold(i)–arylacetylide
Source: Royal Society of Chemistry journal article supplement (doi:10.1039/d4dt03036b), 2025-01-01
Supplement: d4dt03036b1.pdf [file d4dt03036b1.pdf]

# Pressure-induced phase transitions in new luminescent gold(I)-arylacetylide – Supporting Information

Róża Dziewiątkowska<sup>a</sup>, Joanna Krzeszczakowska<sup>a</sup>, Marta Głodek<sup>b</sup>, Michał Łomzik<sup>b</sup>,  
Damian Płażuk<sup>b,c</sup> and Anna Makal<sup>a</sup>

<sup>a</sup> *Chemistry Department, Biological and Chemical Research Centre, University of Warsaw, ul. Żwirki i Wigury 101, 02-089 Warszawa, Poland*

<sup>b</sup> *Department of Organic Chemistry, Faculty of Chemistry, University of Łódź, Tamka 12, 91-403 Łódź, Poland*

<sup>c</sup> *Laboratory of Molecular Spectroscopy, Faculty of Chemistry, University of Łódź, Tamka 12, 91-403 Łódź, Poland*

## Contents

|                                                                                     |            |
|-------------------------------------------------------------------------------------|------------|
| <b>S1 Preliminary analysis</b>                                                      | <b>S2</b>  |
| S1.1 NMR spectra . . . . .                                                          | S2         |
| S1.2 Mass spectrometry (MS) data . . . . .                                          | S4         |
| S1.3 Differential Scanning Calorimetry . . . . .                                    | S5         |
| <b>S2 X-ray diffraction experiments</b>                                             | <b>S6</b>  |
| S2.1 Loading Diamond Anvil Cell . . . . .                                           | S6         |
| S2.1.1 Procedure . . . . .                                                          | S6         |
| S2.1.2 Potency maps . . . . .                                                       | S6         |
| S2.2 Hydrostatic limits for different PTMs . . . . .                                | S9         |
| S2.3 Pressures . . . . .                                                            | S9         |
| S2.4 Data processing, structure solution and refinement . . . . .                   | S9         |
| S2.5 Merging results . . . . .                                                      | S15        |
| S2.6 CCDC deposition numbers . . . . .                                              | S17        |
| <b>S3 Photoluminescence and its variability at increased pressure</b>               | <b>S18</b> |
| <b>S4 Phase transitions</b>                                                         | <b>S19</b> |
| S4.1 Disorder below 0.5 GPa . . . . .                                               | S19        |
| S4.2 Reciprocal layers . . . . .                                                    | S19        |
| S4.3 Second phase transition analysis . . . . .                                     | S21        |
| S4.3.1 <i>in-house</i> measurement . . . . .                                        | S21        |
| S4.3.2 Synhrotron measurement . . . . .                                             | S21        |
| <b>S5 Script for distances calculations</b>                                         | <b>S22</b> |
| <b>S6 Theoretical calculations</b>                                                  | <b>S24</b> |
| S6.1 Theoretical UV-vis spectrum of ArPEt in dichlorometane . . . . .               | S24        |
| S6.2 Optimization of <b>ArPEt</b> crystal structures . . . . .                      | S24        |
| S6.3 Theoretical estimation of Birch-Murnaghan's Equation of States - EOS . . . . . | S25        |

# S1 Preliminary analysis

## S1.1 NMR spectra

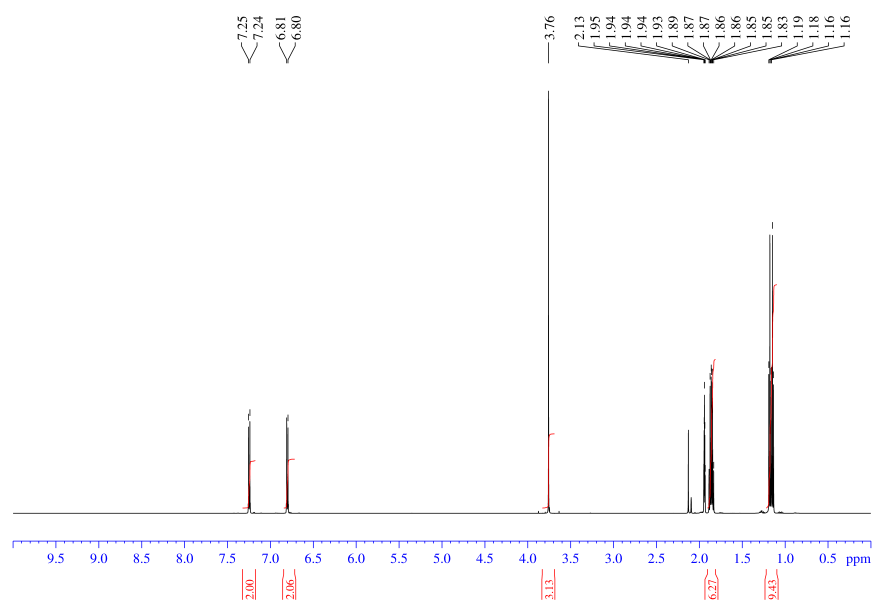

Figure S1.1:  $^1\text{H}$  NMR spectrum for **ArPEt** in  $\text{CD}_3\text{CN}$ .

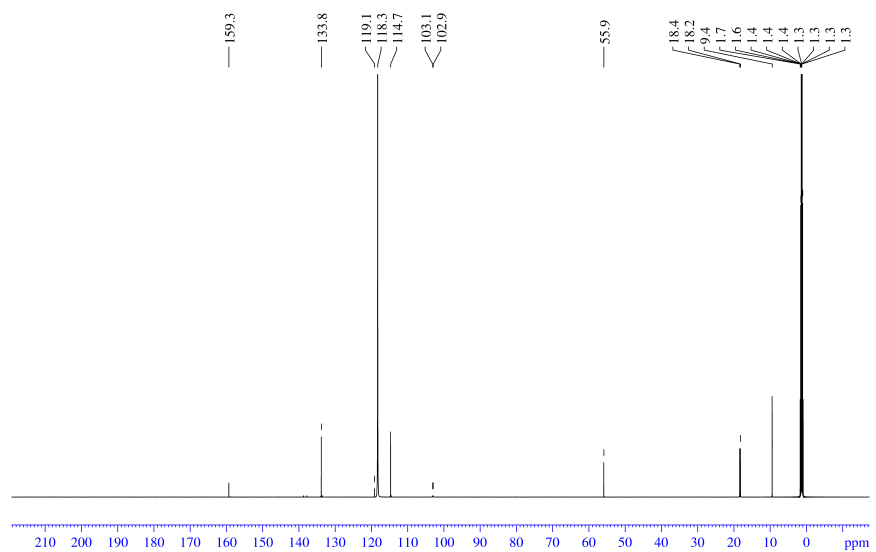

Figure S1.2:  $^{13}\text{C}\{^1\text{H}\}$  NMR spectrum for **ArPEt** in  $\text{CD}_3\text{CN}$ .

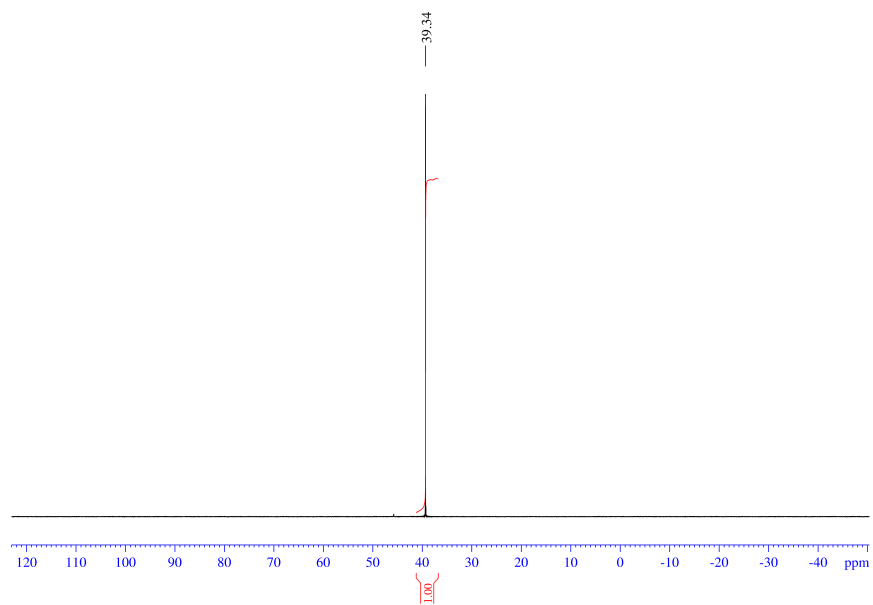

Figure S1.3:  $^{31}\text{P}\{^1\text{H}\}$  NMR spectrum for **ArPEt** in  $\text{CD}_3\text{CN}$ .

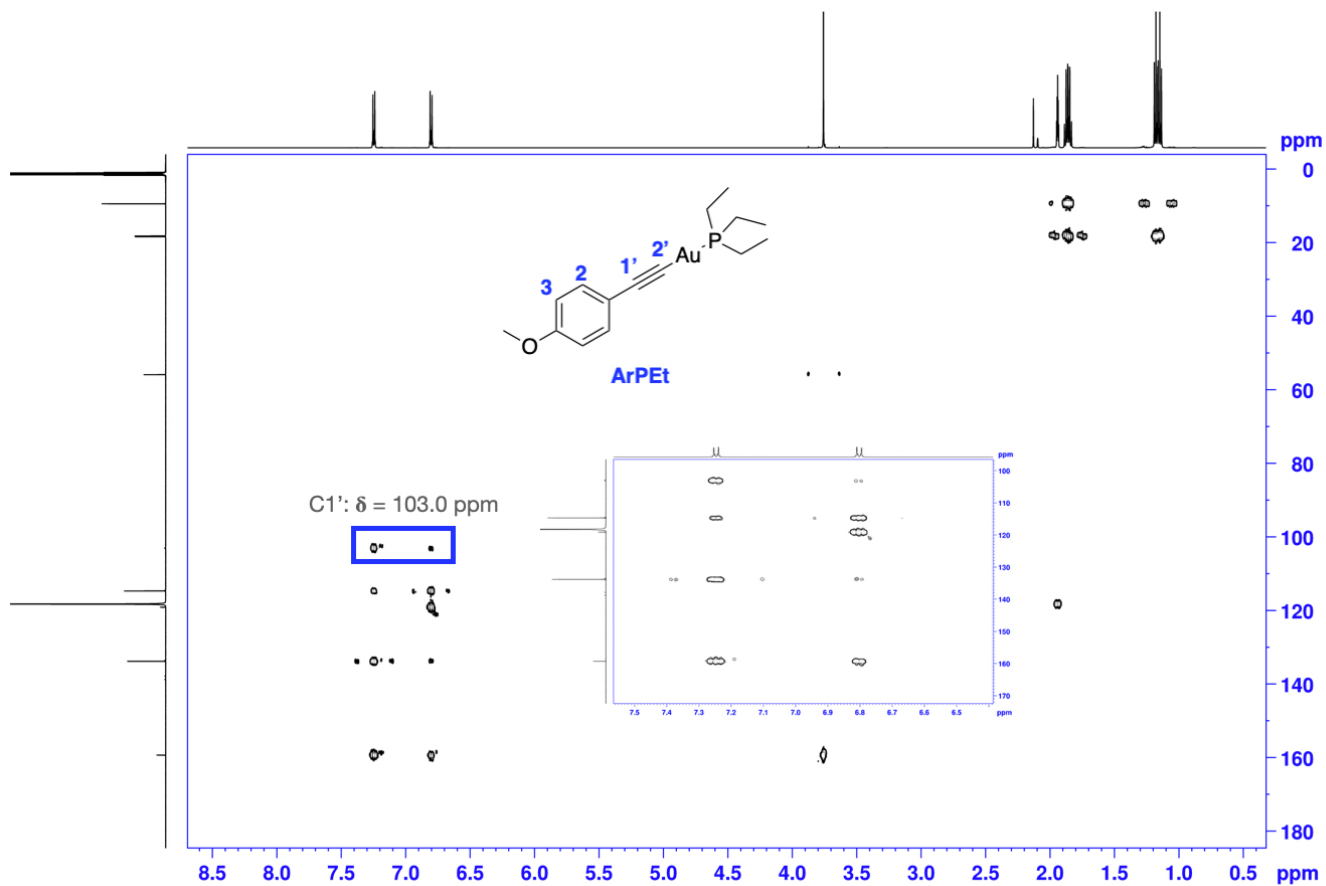

Figure S1.4:  $^1\text{H}-^{13}\text{C}$  HMBC NMR spectrum for **ArPEt** in  $\text{CD}_3\text{CN}$ .

## S1.2 Mass spectrometry (MS) data

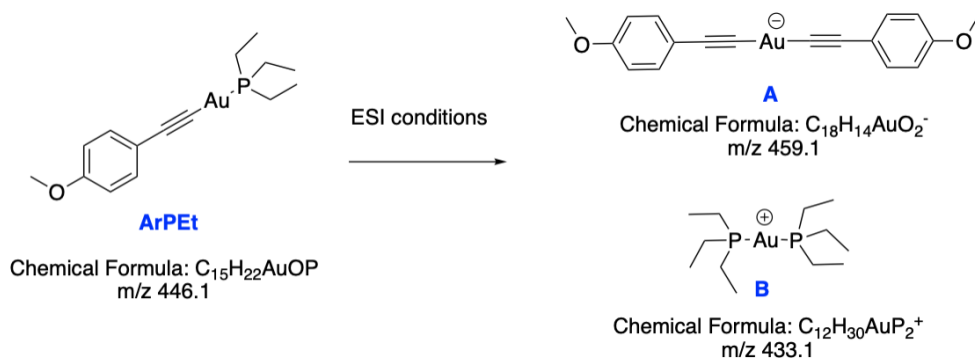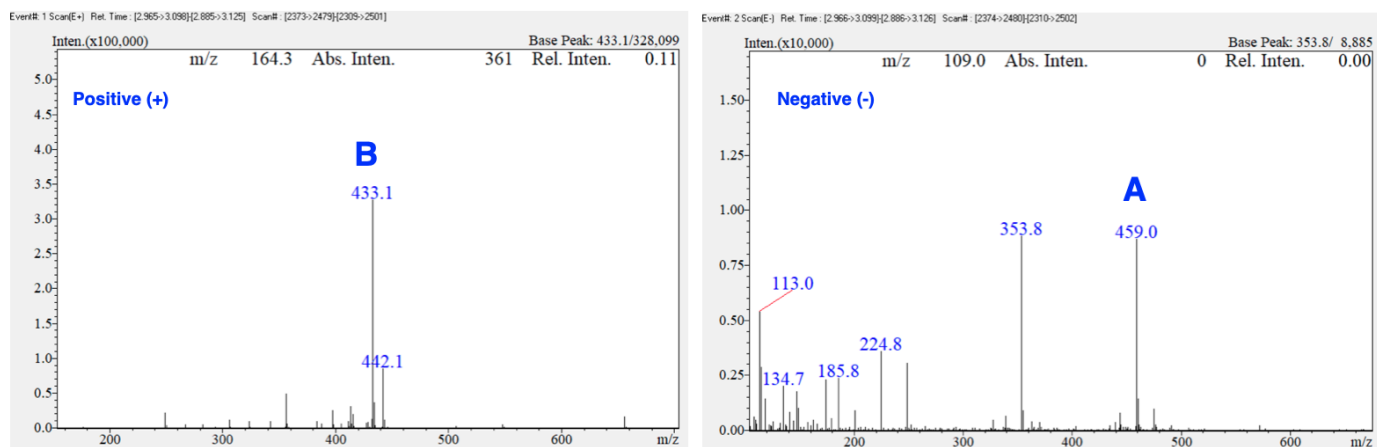

Figure S1.5: ESI-MS analysis for **ArPET**.

### S1.3 Differential Scanning Calorimetry

The DSC measurements were performed using Mettler-Toledo DSC1 STAR<sup>e</sup> system at a cooling/heating rate of 10°C/min under a dry N<sub>2</sub> atmosphere and at a constant flow (60 ml/min) first cooling the sample from 22 to -150°C, then warming it back to 22°C and finally heating it to 100°C. Obtained data were analyzed using the STAR<sup>e</sup> software provided by Mettler Toledo. The total of 10.12 mg was accurately weighted into open standard 40 μl aluminum crucible using Mettler-Toledo XS105 DualRange balance. The results of DSC measurements of ArPET depicted in Figure S1.6. The major endothermic peak at the 87.34 represents the melting point, with the enthalpy of this transition at 36.3 J/g. The minor endo- and exothermic features on cooling, noticeable at 5.75°C and -117.71°C indicate structure reorganizations which will be subject to a separate publication.

Melting point was also redetermined using the MP70 Melting Point System capillary apparatus (Mettler Toledo) with a heating rate of 10°C/min, yielding result within 1°C of the observation from DSC approach.

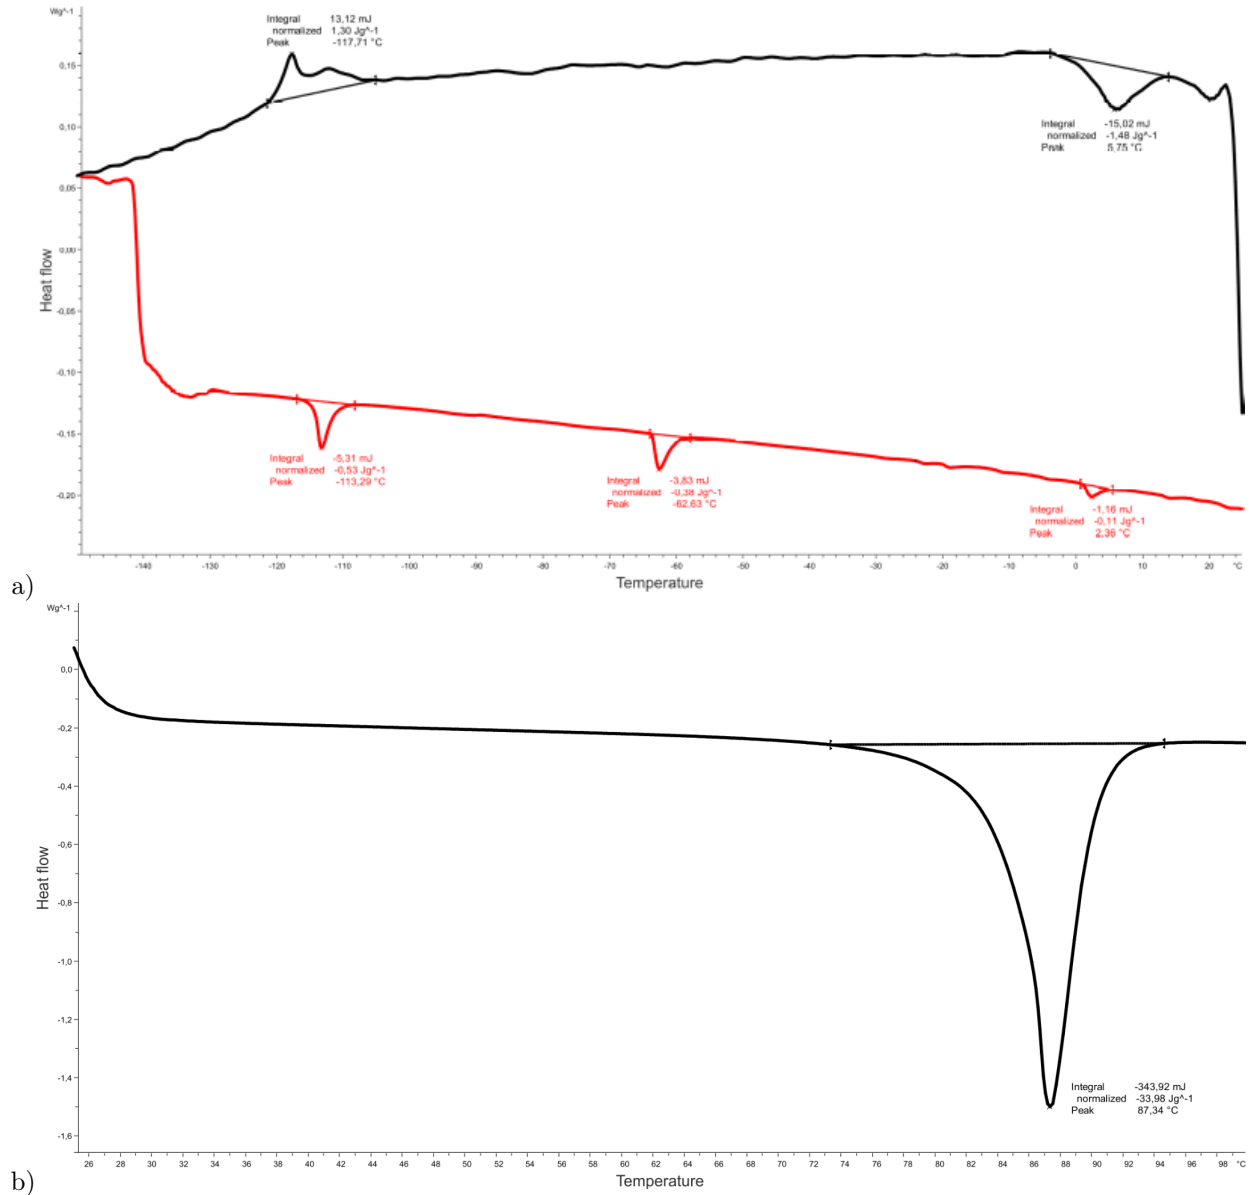

Figure S1.6: Results of DSC measurement of ArPET: a) black line - cooling, red line heating, b) heating up to the melting point

## S2 X-ray diffraction experiments

### S2.1 Loading Diamond Anvil Cell

#### S2.1.1 Procedure

Crystal orientation in DAC is very important to achieve best possible completeness of high-pressure diffraction data, inherently incomplete due to the sample holder. As shown in the work of Tchoń et. al. [Tchoń and Makal(2021)], proper orientation, fully utilizing the crystal symmetry, can increase achievable data completeness almost 2-fold.

In order to orient a crystal, a following procedure was executed. Firstly, a short diffraction 'pre-experiment' was performed and a movie recorded in order to match crystal faces with crystallographic directions. Initial experiments were done at 295 K for series 1 (appr2), 3 (appr5) 4 (appr6) and at 100 K for series 2 (appr 4). Appropriate orientation (allowing to achieve better completeness with possibility of systematic extinction analysis) was determined based on potency maps [Tchoń and Makal(2021)] (see next subsection).

In order to orient specific crystal faces with respect to the DAC axis, a crystal was than affixed to a dried drop of epoxy glue placed in the center of diamond culet. It is important to use as little amount of glue as possible needed to immobilize crystal in DAC.

#### S2.1.2 Potency maps

A potency map shows completeness of high-pressure diffraction data (in %) possible to achieve with a given radiation wavelength, a DAC opening angle and a point group of the crystal as a function of the crystal orientation in a DAC (i.e. the relative position of crystallographic directions with respect to the vector normal to the diamond culets). It indicates the range of the most convenient orientations of a crystal prior to its placement, but also allows to determine how much data can be collected from an already mounted sample by marking its particular orientation as a point on the map.

Potency maps used in this work (Figures S2.7 – S2.11) were calculated using Python script written by Daniel Tchoń [Tchoń and Makal(2021)]. Crystallographic directions in figures are consistent with the conventional  $Pbca$ ,  $Pca2_1$  and  $Pc$  unit cell settings – differently than it was chosen in the article ( $Pbca$ ,  $Pb2_1a$  and  $P11a$ ). The actually achieved orientations for each crystal were marked with black squares.

Without sample orienting, crystals tend to lay on their main faces, which would usually result in one of the crystallographic directions being aligned with the vector normal to the diamond culet and consequently in minimal or close to minimal potency. It is clearly visible in case of series 2 (appr4, Figure S2.8), where crystal was not properly glued and moved during closing DAC and increasing pressure. Resulting potency is much lower than "average" (mean value in idealized situation, when crystal is spherical) potency.

Interestingly, potency value close to average was achieved as the mean of values for four crystal specimens from synchrotron measurements. Those specimens derived from bigger crystals which were cut into small pieces.

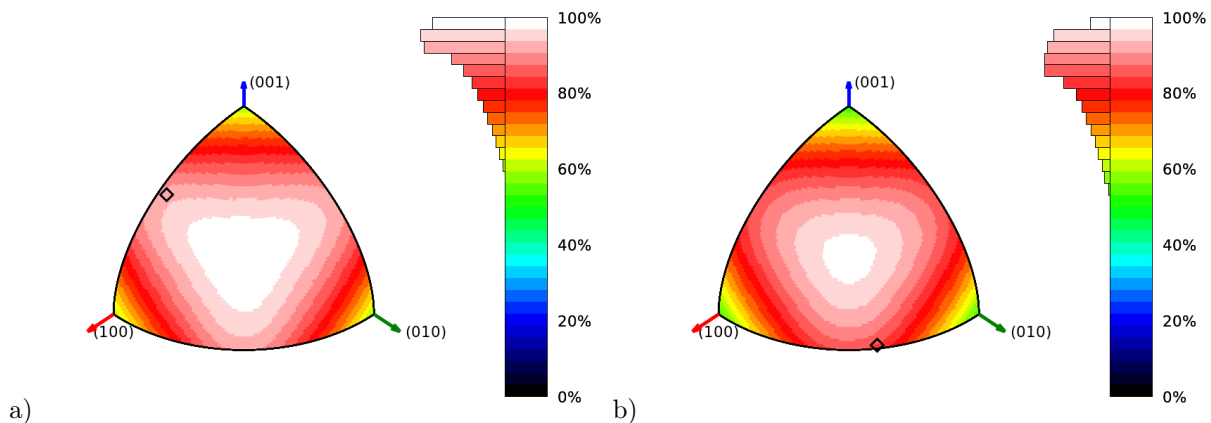

Figure S2.7: Potency maps for chosen pressure points before and after first phase transition for series 1:

a) appr2\_0p26GPa, potency: 0.9234 (min: 0.5896, max: 0.9969, average: 0.8836),

b) appr2\_0p89GPa, potency: 0.8372 (min: 0.5207, max: 0.9826, average: 0.8417).

Directions on graph b) are consistent with  $Pca2_1$  space group instead of  $Pb2_1a$  space group.

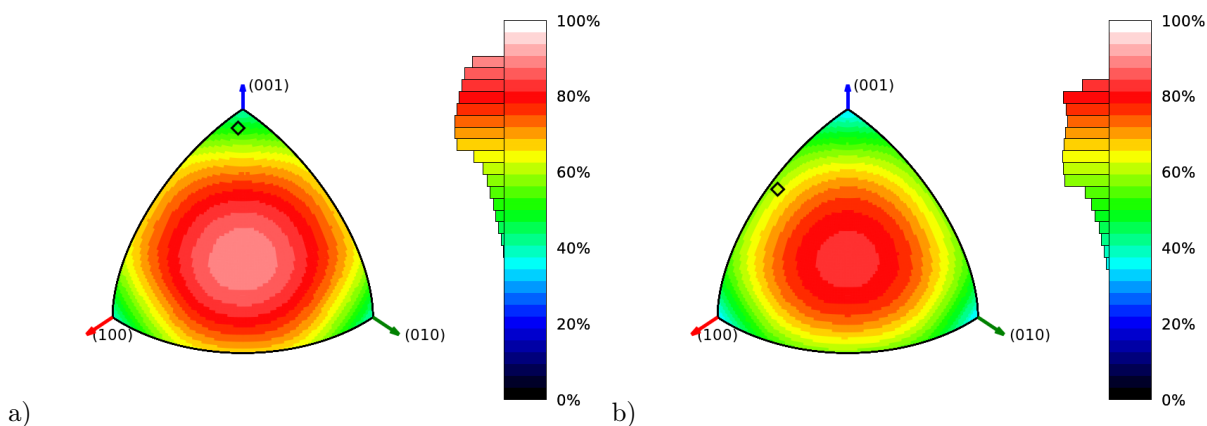

Figure S2.8: Potency maps for chosen pressure points for series 2:

a) appr4\_0p16GPa, potency: 0.4963 (min: 0.3800, max: 0.9024, average: 0.7251),

b) appr4\_0p45GPa, potency: 0.6102 (min: 0.3257, max: 0.8305, average: 0.6605).

Crystal was not properly glued and moved in DAC during closing it and with increasing pressure.

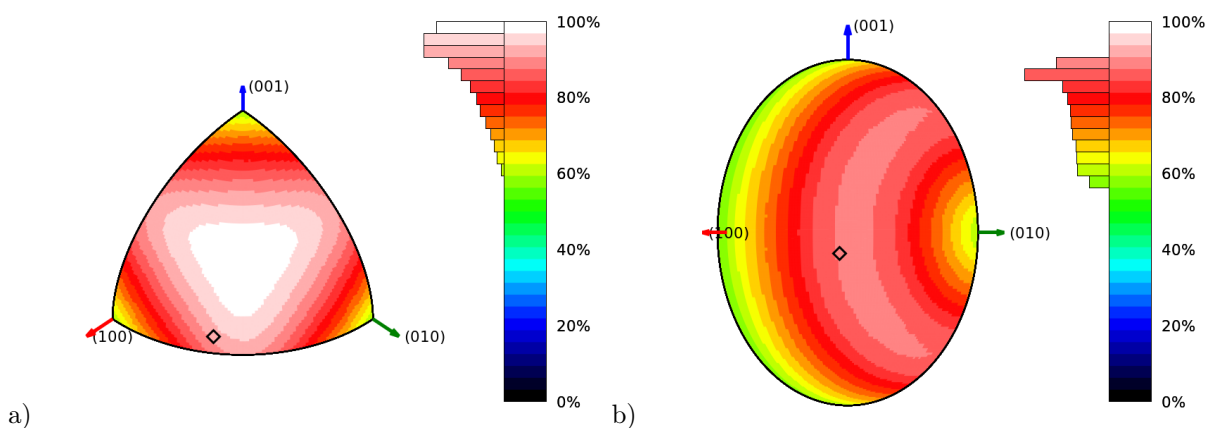

Figure S2.9: Potency maps for chosen pressure points (beginning and final) for series 3:

a) appr5\_0p33GPa, potency: 0.9169 (min: 0.5783, max: 0.9966, average: 0.8795),

b) appr5\_2p13GPa, potency: 0.8764 (min: 0.5704, max: 0.8845, average: 0.7639).

Directions on graph b) are consistent with  $Pc$  space group instead of  $P11a$  space group.

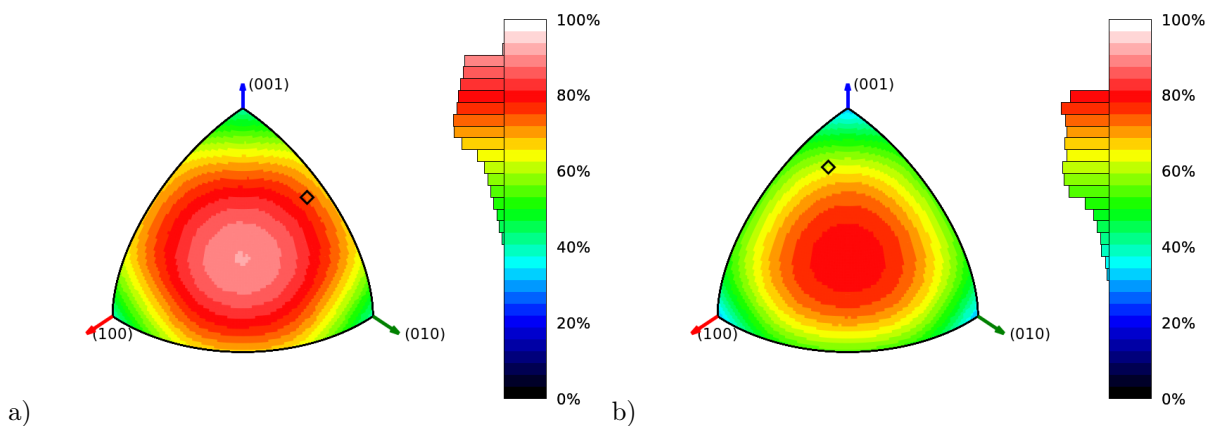

Figure S2.10: Potency maps for chosen pressure points before and after second phase transition for series 4:

a) appr6\_0p94GPa, potency: 0.7459 (min: 0.3715, max: 0.9085, average: 0.7336),

b) appr6\_2p59GPa, potency: 0.6216 (min: 0.3023, max: 0.8063, average: 0.6388).

Directions on graph b) are consistent with  $Pca_2_1$  space group instead of  $Pb_2_1a$  space group.

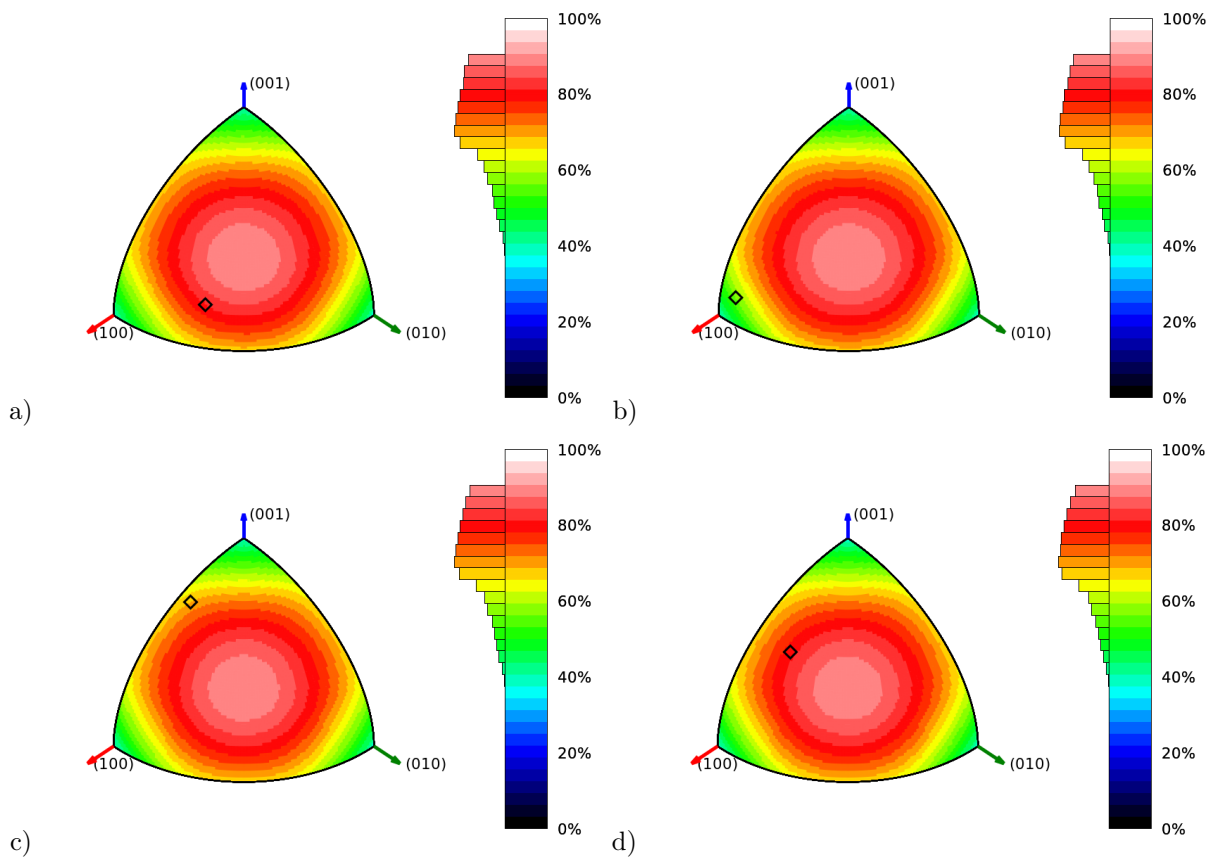

Figure S2.11: Potency maps for chosen pressure point for synchrotron series:

a) 0002\_1p62GPa, potency: 0.8110 (min: 0.3928, max: 0.9055, average: 0.7286),

b) 0003\_1p62GPa, potency: 0.5665 (min: 0.3932, max: 0.9058, average: 0.7290),

c) 0004\_1p62GPa, potency: 0.6859 (min: 0.3904, max: 0.9043, average: 0.7271),

d) 0005\_1p62GPa, potency: 0.7971 (min: 0.3890, max: 0.9029, average: 0.7259).

Directions on graphs are consistent with  $Pca2_1$  space group instead of  $Pb2_1a$  space group.

Average potency from all crystals: 0.7151 – similar to theoretical average potency calculated by DTool.



## S2.2 Hydrostatic limits for different PTMs

Silicone oils are reported as having a hydrostatic limit from 0.9 GPa to 3.0 GPa [Klotz *et al.*(2009)Klotz, Chervin, Munsch, and Le Marchand; Angel *et al.*(2007)Angel, Bujak, Zhao, Gatta, and Jacobsen] depending on the exact variant. Pressure dependencies of the unit cell parameters show that our particular oil may act as non-hydrostatic above 2.0 GPa. This hypothesis could be further supported by the fact, that maximum pressure at which structure of **ArPEt** could be solved and refined when applying this PTM is 2.13 GPa. The n-pentane and i-pentane 1:1 mixture is reported quasi-hydrostatic up to 7.4 GPa and Daphne-7575 has hydrostatic limit of 6.5 GPa [Klotz *et al.*(2009)Klotz, Chervin, Munsch, and Le Marchand], so they are expected to provide isotropic compression of **ArPEt** in the studied pressure range (up to 3.30 GPa).

## S2.3 Pressures

Table S2.1: Pressure points for *in-house* diffraction experiments series. Nominal uncertainties of pressure determination were in range 0.03–0.04 GPa. Points marked by asterisk (\*) relate to pressures at which diffraction experiments have been done but structure was not determined (crystal broke into to many pieces). Structure from pressure point marked by (\*\*) was non-solvable.

| Non-hydrostatic medium (silicone oil) |                |      |      |       |      |      |      |      |      |       |   |
|---------------------------------------|----------------|------|------|-------|------|------|------|------|------|-------|---|
| Series                                | Pressure [GPa] |      |      |       |      |      |      |      |      |       |   |
| 1 (appr2)                             | 0.26           | –    | –    | 0.57  | 0.89 | 1.12 | 1.43 | 1.89 | –    | 2.42* | – |
| 2 (appr4)                             | 0.16           | 0.32 | 0.45 | 0.72* | –    | –    | –    | –    | –    | –     | – |
| 3 (appr5)                             | –              | 0.33 | –    | 0.64  | –    | –    | –    | –    | 2.13 | 2.42* | – |

  

| Quasi-hydrostatic medium (n-pentane/i-pentane 1:1 mixture) |                |   |   |      |      |   |      |      |        |      |      |
|------------------------------------------------------------|----------------|---|---|------|------|---|------|------|--------|------|------|
| Series                                                     | Pressure [GPa] |   |   |      |      |   |      |      |        |      |      |
| 4 (appr6)                                                  | –              | – | – | 0.58 | 0.94 | – | 1.64 | 1.94 | 2.16** | 2.31 | 2.59 |

Table S2.2: Pressure points for synchrotron diffraction experiments series. Nominal uncertainties of pressure determination were in range 0.03–0.04 GPa.

| Quasi-hydrostatic medium (Daphne-7575) |                |      |      |      |      |
|----------------------------------------|----------------|------|------|------|------|
| Series                                 | Pressure [GPa] |      |      |      |      |
| synchrotron                            | 1.62           | 1.80 | 2.16 | 2.66 | 3.30 |

## S2.4 Data processing, structure solution and refinement

Hydrogen atoms were placed based on carbon atoms geometry. Atomic displacement parameters for hydrogen atoms were refined isotropically and for remaining atoms – anisotropically. Structure from atmospheric pressure was refined without additional restrains. For structures from high-pressure data there was no need to add restrains to molecules geometry expect same bond distances in disordered structures. Remain used restrains relate to atomic displacement parameters modeling to avoid non-physical values.

Table S2.3: Unit cell metrics, selected crystallographic data and refinement statistics for *in-house* experiments – part 1.

|                                              | <i>C<sub>15</sub>H<sub>22</sub>AuOP</i><br>446.26 |                    |                         |                         |                         |
|----------------------------------------------|---------------------------------------------------|--------------------|-------------------------|-------------------------|-------------------------|
| Empirical formula                            |                                                   |                    |                         |                         |                         |
| Formula weight [ $\frac{g}{mol}$ ]           |                                                   |                    |                         |                         |                         |
| Identification code                          | appr0_1atm                                        | appr2_0p26GPa      | appr2_0p57GPa           | appr2_0p89GPa           | appr2_1p12GPa           |
| Temperature [K]                              | 293(2)                                            | 295.3(10)          | 295.8(2)                | 295.65(16)              | 295.5(5)                |
| Pressure [GPa]                               | 0.0001                                            | 0.26               | 0.57                    | 0.89                    | 1.12                    |
| Opening angle [°]                            | –                                                 | 52                 | 52                      | 52                      | 52                      |
| Crystal system                               | orthorhombic                                      | orthorhombic       | orthorhombic            | orthorhombic            | orthorhombic            |
| Space group                                  | <i>Pbca</i>                                       | <i>Pbca</i>        | <i>Pb2<sub>1</sub>a</i> | <i>Pb2<sub>1</sub>a</i> | <i>Pb2<sub>1</sub>a</i> |
| a [Å]                                        | 16.3373(7)                                        | 16.1780(6)         | 17.1700(18)             | 17.3429(4)              | 17.1407(10)             |
| b [Å]                                        | 11.3081(5)                                        | 11.1922(3)         | 9.9744(5)               | 9.9201(2)               | 9.8864(4)               |
| c [Å]                                        | 17.9484(8)                                        | 17.8018(8)         | 17.6072(15)             | 16.9287(5)              | 16.8388(12)             |
| $\alpha, \beta, \gamma$ [°]                  | 90, 90, 90                                        | 90, 90, 90         | 90, 90, 90              | 90, 90, 90              | 90, 90, 90              |
| Volume [Å <sup>3</sup> ]                     | 3315.9(3)                                         | 3223.3(2)          | 3015.4(4)               | 2912.47(12)             | 2853.5(3)               |
| Z                                            | 8                                                 | 8                  | 8                       | 8                       | 8                       |
| $\rho_{calc}$ [ $\frac{g}{cm^3}$ ]           | 1.788                                             | 1.839              | 1.966                   | 2.035                   | 2.078                   |
| $\mu$ [ $mm^{-1}$ ]                          | 4.843                                             | 4.982              | 5.325                   | 5.513                   | 5.627                   |
| F(000)                                       | 1712                                              | 1712               | 1712                    | 1712                    | 1712                    |
| Crystal size [ $mm^3$ ]                      | 0.59 x 0.28 x 0.17                                | 0.18 x 0.13 x 0.09 | 0.18 x 0.13 x 0.09      | 0.18 x 0.13 x 0.09      | 0.18 x 0.13 x 0.09      |
| Radiation source                             | Ag K $\alpha$                                     | Ag K $\alpha$      | Ag K $\alpha$           | Ag K $\alpha$           | Ag K $\alpha$           |
| Radiation wavelength [Å]                     | 0.56087                                           | 0.56087            | 0.56087                 | 0.56087                 | 0.56087                 |
| 2 $\theta$ range                             | 3.894 to 52.746                                   | 3.932 to 42.142    | 3.744 to 43.786         | 3.706 to 54.058         | 3.75 to 46.004          |
| Reflections collected                        | 14048                                             | 41474              | 31068                   | 52871                   | 40946                   |
| $R_{int}$                                    | 0.0341                                            | 0.0791             | 0.1107                  | 0.0618                  | 0.0873                  |
| Resolution [Å]                               | 0.6313                                            | 0.7800             | 0.7521                  | 0.6171                  | 0.7177                  |
| Completeness                                 | 0.984                                             | 0.929              | 0.906                   | 0.912                   | 0.914                   |
| Data; restraints; parameters                 | 6050; 0; 239                                      | 3269; 224; 251     | 6258; 1; 334            | 10223; 1; 334           | 7156; 1; 334            |
| $R_1, wR_2$ ( $I > 2\sigma(I)$ )             | 0.0464, 0.0761                                    | 0.0328, 0.0452     | 0.0476, 0.0779          | 0.0382, 0.0475          | 0.0440, 0.0864          |
| $R_1, wR_2$ (all data)                       | 0.1300, 0.1036                                    | 0.0915, 0.0572     | 0.0821, 0.0910          | 0.0882, 0.0564          | 0.0691, 0.0982          |
| Largest diff. peak/hole [ $e\text{Å}^{-3}$ ] | 0.794/-0.589                                      | 0.563/-0.476       | 1.516/-1.701            | 1.194/-1.026            | 1.981/-1.439            |
| Flack parameter                              | –                                                 | –                  | 0.52(4)                 | 0.457(18)               | 0.54(3)                 |

Table S2.4: Unit cell metrics, selected crystallographic data and refinement statistics for *in-house* experiments – part 2.

|                                              | <i>C<sub>15</sub>H<sub>22</sub>AuOP</i><br>446.26 |                         |                    |                    |                    |
|----------------------------------------------|---------------------------------------------------|-------------------------|--------------------|--------------------|--------------------|
| Empirical formula                            |                                                   |                         |                    |                    |                    |
| Formula weight [ $\frac{g}{mol}$ ]           |                                                   |                         |                    |                    |                    |
| Identification code                          | appr22_1p43GPa                                    | appr2_1p89GPa           | appr4_0p16GPa      | appr4_0p32GPa      | appr4_0p45GPa      |
| Temperature [K]                              | 295.6(3)                                          | 295.2(6)                | 295.1(4)           | 295.40(16)         | 295.3(4)           |
| Pressure [GPa]                               | 1.43                                              | 1.89                    | 0.16               | 0.32               | 0.45               |
| Opening angle [°]                            | 52                                                | 52                      | 38                 | 38                 | 38                 |
| Crystal system                               | orthorhombic                                      | orthorhombic            | orthorhombic       | orthorhombic       | orthorhombic       |
| Space group                                  | <i>Pb2<sub>1</sub>a</i>                           | <i>Pb2<sub>1</sub>a</i> | <i>Pbca</i>        | <i>Pbca</i>        | <i>Pbca</i>        |
| a [Å]                                        | 17.0578(5)                                        | 16.9596(8)              | 16.527(3)          | 16.215(3)          | 16.168(2)          |
| b [Å]                                        | 9.8693(2)                                         | 9.8810(3)               | 11.2886(14)        | 11.0942(12)        | 10.9575(12)        |
| c [Å]                                        | 16.7532(6)                                        | 16.6423(12)             | 17.901(13)         | 17.732(4)          | 17.526(4)          |
| $\alpha, \beta, \gamma$ [°]                  | 90, 90, 90                                        | 90, 90, 90              | 90, 90, 90         | 90, 90, 90         | 90, 90, 90         |
| Volume [Å <sup>3</sup> ]                     | 2820.38(14)                                       | 2788.9(3)               | 3340(2)            | 3189.9(10)         | 3104.8(10)         |
| Z                                            | 8                                                 | 8                       | 8                  | 8                  | 8                  |
| $\rho_{calc}$ [ $\frac{g}{cm^3}$ ]           | 2.102                                             | 2.126                   | 1.775              | 1.858              | 1.909              |
| $\mu$ [ $mm^{-1}$ ]                          | 5.693                                             | 5.758                   | 4.808              | 5.034              | 5.172              |
| F(000)                                       | 1712                                              | 1712                    | 1712               | 1712               | 1712               |
| Crystal size [ $mm^3$ ]                      | 0.18 x 0.13 x 0.09                                | 0.18 x 0.13 x 0.09      | 0.14 x 0.09 x 0.06 | 0.14 x 0.09 x 0.06 | 0.14 x 0.09 x 0.06 |
| Radiation source                             | Ag K $\alpha$                                     | Ag K $\alpha$           | Ag K $\alpha$      | Ag K $\alpha$      | Ag K $\alpha$      |
| Radiation wavelength [Å]                     | 0.56087                                           | 0.56087                 | 0.56087            | 0.56087            | 0.56087            |
| 2 $\theta$ range                             | 3.768 to 54.022                                   | 3.79 to 53.842          | 3.888 to 41.036    | 3.95 to 41.028     | 3.976 to 50.99     |
| Reflections collected                        | 49031                                             | 49554                   | 7576               | 8296               | 10035              |
| $R_{int}$                                    | 0.0596                                            | 0.0742                  | 0.0885             | 0.0837             | 0.0783             |
| Resolution [Å]                               | 0.6175                                            | 0.6194                  | 0.8001             | 0.8002             | 0.6515             |
| Completeness                                 | 0.914                                             | 0.914                   | 0.484              | 0.703              | 0.723              |
| Data; restraints; parameters                 | 9888; 1; 334                                      | 9749; 1; 334            | 1596; 252; 225     | 2239; 228; 227     | 3319; 206; 227     |
| $R_1, wR_2$ ( $I > 2\sigma(I)$ )             | 0.0381, 0.0488                                    | 0.0450, 0.0571          | 0.0440, 0.0712     | 0.0525, 0.0657     | 0.0537, 0.0892     |
| $R_1, wR_2$ (all data)                       | 0.0816, 0.0571                                    | 0.1038, 0.0682          | 0.1751, 0.1075     | 0.1764, 0.0953     | 0.2449, 0.1402     |
| Largest diff. peak/hole [ $e\text{Å}^{-3}$ ] | 1.065/-0.966                                      | 1.092/-1.621            | 0.424/-0.303       | 0.623/-0.409       | 0.637/-0.843       |
| Flack parameter                              | 0.483(17)                                         | 0.58(2)                 | –                  | –                  | –                  |

Table S2.5: Unit cell metrics, selected crystallographic data and refinement statistics for *in-house* experiments – part 3.

|                                              | <i>C</i> <sub>15</sub> <i>H</i> <sub>22</sub> <i>AuOP</i><br>446.26 |                         |                    |                         |                         |
|----------------------------------------------|---------------------------------------------------------------------|-------------------------|--------------------|-------------------------|-------------------------|
| Empirical formula                            |                                                                     |                         |                    |                         |                         |
| Formula weight [ $\frac{g}{mol}$ ]           |                                                                     |                         |                    |                         |                         |
| Identification code                          | appr5_0p33GPa                                                       | appr5_0p64GPa           | appr5_2p13GPa      | appr6_0p58GPa           | appr6_0p94GPa           |
| Temperature [K]                              | 295.5(3)                                                            | 294.3(6)                | 294.7(3)           | 293(2)                  | 293(2)                  |
| Pressure [GPa]                               | 0.33                                                                | 0.64                    | 2.13               | 0.58                    | 0.94                    |
| Opening angle [°]                            | 51                                                                  | 51                      | 51                 | 39                      | 39                      |
| Crystal system                               | orthorhombic                                                        | orthorhombic            | monoclinic         | orthorhombic            | orthorhombic            |
| Space group                                  | <i>Pbca</i>                                                         | <i>Pb2<sub>1</sub>a</i> | <i>P11a</i>        | <i>Pb2<sub>1</sub>a</i> | <i>Pb2<sub>1</sub>a</i> |
| a [Å]                                        | 16.0628(9)                                                          | 17.6564(8)              | 16.7021(6)         | 17.5579(5)              | 17.2929(5)              |
| b [Å]                                        | 11.0945(4)                                                          | 9.9742(4)               | 9.8830(3)          | 9.9652(4)               | 9.9154(4)               |
| c [Å]                                        | 17.7070(6)                                                          | 17.1118(5)              | 16.8029(4)         | 17.0487(9)              | 16.8744(7)              |
| $\alpha, \beta, \gamma$ [°]                  | 90, 90, 90                                                          | 90, 90, 90              | 90, 90, 93.865(3)  | 90, 90, 90              | 90, 90, 90              |
| Volume [Å <sup>3</sup> ]                     | 3155.5(2)                                                           | 3013.5(2)               | 2767.29(14)        | 2983.0(2)               | 2893.39(17)             |
| Z                                            | 8                                                                   | 8                       | 8                  | 8                       | 8                       |
| $\rho_{calc}$ [ $\frac{g}{cm^3}$ ]           | 1.879                                                               | 1.967                   | 2.142              | 1.987                   | 2.049                   |
| $\mu$ [ $mm^{-1}$ ]                          | 5.089                                                               | 5.328                   | 5.803              | 5.383                   | 5.550                   |
| F(000)                                       | 1712                                                                | 1712                    | 1712               | 1712                    | 1712                    |
| Crystal size [ $mm^3$ ]                      | 0.14 x 0.12 x 0.11                                                  | 0.14 x 0.12 x 0.11      | 0.14 x 0.12 x 0.11 | 0.16 x 0.12 x 0.10      | 0.16 x 0.12 x 0.10      |
| Radiation source                             | Ag K $\alpha$                                                       | Ag K $\alpha$           | Ag K $\alpha$      | AgK $\alpha$            | Ag K $\alpha$           |
| Radiation wavelength [Å]                     | 0.56087                                                             | 0.56087                 | 0.56087            | 0.56087                 | 0.56087                 |
| 2 $\theta$ range                             | 3.63 to 41.02                                                       | 3.64 to 51.446          | 5.026 to 41.954    | 3.662 to 42.71          | 4.932 to 42.202         |
| Reflections collected                        | 35162                                                               | 45778                   | 22719              | 17619                   | 12415                   |
| $R_{int}$                                    | 0.0850                                                              | 0.0906                  | 0.0547             | 0.0506                  | 0.0479                  |
| Resolution [Å]                               | 0.8004                                                              | 0.6461                  | 0.7834             | 0.7701                  | 0.7790                  |
| Completeness                                 | 0.919                                                               | 0.928                   | 0.651              | 0.722                   | 0.741                   |
| Data; restraints; parameters                 | 2939; 204; 238                                                      | 9388; 1; 334            | 7038; 410; 666     | 4264; 67; 334           | 3426; 115; 334          |
| $R_1, wR_2$ ( $I > 2\sigma(I)$ )             | 0.0522, 0.1311                                                      | 0.0472, 0.0505          | 0.0432, 0.0630     | 0.0359, 0.0508          | 0.0395, 0.0447          |
| $R_1, wR_2$ (all data)                       | 0.1092, 0.1734                                                      | 0.1365, 0.0640          | 0.0749, 0.0711     | 0.0871, 0.0640          | 0.0830, 0.0524          |
| Largest diff. peak/hole [ $e\text{Å}^{-3}$ ] | 1.075/-1.755                                                        | 0.881/-0.700            | 0.926/-0.971       | 1.099/-1.174            | 0.871/-0.676            |
| Flack parameter                              | –                                                                   | 0.07(2)                 | 0.06(3)            | 0.71(3)                 | 0.69(4)                 |

Table S2.6: Unit cell metrics, selected crystallographic data and refinement statistics for *in-house* experiments – part 4.

|                                              | <i>C</i> <sub>15</sub> <i>H</i> <sub>22</sub> <i>AuOP</i><br>446.26 |                         |                    |                    |
|----------------------------------------------|---------------------------------------------------------------------|-------------------------|--------------------|--------------------|
| Empirical formula                            |                                                                     |                         |                    |                    |
| Formula weight [ $\frac{g}{mol}$ ]           |                                                                     |                         |                    |                    |
| Identification code                          | appr6_1p64GPa                                                       | appr6_1p94GPa           | appr6_2p31GPa      | appr6_2p59GPa      |
| Temperature [K]                              | 293(2)                                                              | 293(2)                  | 293(2)             | 293(2)             |
| Pressure [GPa]                               | 1.64                                                                | 1.94                    | 2.31               | 2.59               |
| Opening angle [°]                            | 38.5                                                                | 38.5                    | 38                 | 37                 |
| Crystal system                               | orthorhombic                                                        | orthorhombic            | orthorhombic       | orthorhombic       |
| Space group                                  | <i>Pb2<sub>1</sub>a</i>                                             | <i>Pb2<sub>1</sub>a</i> | <i>Pbca</i>        | <i>Pbca</i>        |
| a [Å]                                        | 17.0308(6)                                                          | 16.9003(5)              | 16.9137(6)         | 16.7686(6)         |
| b [Å]                                        | 9.8580(5)                                                           | 9.8370(4)               | 9.8518(5)          | 9.8173(2)          |
| c [Å]                                        | 16.7203(11)                                                         | 16.6364(10)             | 16.3267(11)        | 16.1828(17)        |
| $\alpha, \beta, \gamma$ [°]                  | 90, 90, 90                                                          | 90, 90, 90              | 90, 90, 90         | 90, 90, 90         |
| Volume [Å <sup>3</sup> ]                     | 2807.2(3)                                                           | 2765.8(2)               | 2720.5(2)          | 2664.1(3)          |
| Z                                            | 8                                                                   | 8                       | 8                  | 8                  |
| $\rho_{calc}$ [ $\frac{g}{cm^3}$ ]           | 2.112                                                               | 2.143                   | 2.179              | 2.225              |
| $\mu$ [ $mm^{-1}$ ]                          | 5.720                                                               | 5.806                   | 5.902              | 6.027              |
| F(000)                                       | 1712                                                                | 1712                    | 1712               | 1712               |
| Crystal size [ $mm^3$ ]                      | 0.16 x 0.12 x 0.10                                                  | 0.16 x 0.12 x 0.10      | 0.16 x 0.12 x 0.10 | 0.16 x 0.12 x 0.10 |
| Radiation source                             | Ag K $\alpha$                                                       | Ag K $\alpha$           | Ag K $\alpha$      | Ag K $\alpha$      |
| Radiation wavelength [Å]                     | 0.56087                                                             | 0.56087                 | 0.56087            | 0.56087            |
| 2 $\theta$ range                             | 3.774 to 51.308                                                     | 3.804 to 51.218         | 3.8 to 51.244      | 3.834 to 51.376    |
| Reflections collected                        | 17793                                                               | 17169                   | 13822              | 11137              |
| $R_{int}$                                    | 0.0630                                                              | 0.0652                  | 0.0767             | 0.1009             |
| Resolution [Å]                               | 0.6478                                                              | 0.6488                  | 0.6485             | 0.6470             |
| Completeness                                 | 0.737                                                               | 0.724                   | 0.700              | 0.639              |
| Data; restraints; parameters                 | 5367; 151; 334                                                      | 5195; 229; 334          | 2984; 6; 166       | 2732; 6; 167       |
| $R_1, wR_2$ ( $I > 2\sigma(I)$ )             | 0.0536, 0.0988                                                      | 0.0477, 0.0524          | 0.0830, 0.1640     | 0.0464, 0.0601     |
| $R_1, wR_2$ (all data)                       | 0.1401, 0.1343                                                      | 0.1070, 0.0626          | 0.1346, 0.1808     | 0.1155, 0.0747     |
| Largest diff. peak/hole [ $e\text{Å}^{-3}$ ] | 1.871/-2.894                                                        | 1.242/-0.843            | 3.094/-2.572       | 1.166/-1.014       |
| Flack parameter                              | 0.35(5)                                                             | 0.70(3)                 | –                  | –                  |

Table S2.7: Unit cell metrics, selected crystallographic data and refinement statistics for synchrotron experiments – part 1.

|                                              | $C_{15}H_{22}AuOP$     |                       |                         |                        |
|----------------------------------------------|------------------------|-----------------------|-------------------------|------------------------|
| Empirical formula                            | $C_{15}H_{22}AuOP$     |                       |                         |                        |
| Formula weight [ $\frac{g}{mol}$ ]           | 446.26                 |                       |                         |                        |
| Temperature [K]                              | 293(2)                 |                       |                         |                        |
| Pressure [GPa]                               | 1.62                   |                       |                         |                        |
| Opening angle [°]                            | 39                     |                       |                         |                        |
| Identification code                          | 0002_1p62GPa           | 0003_1p62GPa          | 0004_1p62GPa            | 0005_1p62GPa           |
| Crystal system                               | orthorhombic           | orthorhombic          | orthorhombic            | orthorhombic           |
| Space group                                  | $Pb2_1a$               | $Pb2_1a$              | $Pb2_1a$                | $Pb2_1a$               |
| a [Å]                                        | 17.0210(5)             | 17.0148(15)           | 17.0137(3)              | 17.0066(3)             |
| b [Å]                                        | 9.85683(19)            | 9.85340(19)           | 9.85586(8)              | 9.85656(13)            |
| c [Å]                                        | 16.7157(3)             | 16.7117(3)            | 16.7032(5)              | 16.7104(3)             |
| $\alpha, \beta, \gamma$ [°]                  | 90, 90, 90             | 90, 90, 90            | 90, 90, 90              | 90, 90, 90             |
| Volume [Å <sup>3</sup> ]                     | 2804.45(12)            | 2801.8(3)             | 2800.87(9)              | 2801.12(7)             |
| Z                                            | 8                      | 8                     | 8                       | 8                      |
| $\rho_{calc}$ [ $\frac{g}{cm^3}$ ]           | 2.114                  | 2.116                 | 2.117                   | 2.116                  |
| $\mu$ [ $mm^{-1}$ ]                          | 2.577                  | 2.579                 | 2.580                   | 2.580                  |
| F(000)                                       | 1712                   | 1712                  | 1712                    | 1712                   |
| Crystal size [ $mm^3$ ]                      | 0.002 x 0.0015 x 0.001 | 0.002 x 0.002 x 0.001 | 0.0025 x 0.002 x 0.0015 | 0.004 x 0.0015 x 0.001 |
| Radiation source                             | synchrotron            | synchrotron           | synchrotron             | synchrotron            |
| Radiation wavelength [Å]                     | 0.410                  | 0.410                 | 0.410                   | 0.410                  |
| $2\theta$ range                              | 3.092 to 43.174        | 3.91 to 43.078        | 3.094 to 43.434         | 3.1 to 43.632          |
| Reflections collected                        | 10170                  | 9214                  | 10054                   | 10372                  |
| $R_{int}$                                    | 0.0308                 | 0.0326                | 0.0334                  | 0.0254                 |
| Resolution [Å]                               | 0.5572                 | 0.5584                | 0.5540                  | 0.5516                 |
| Completeness                                 | 0.808                  | 0.606                 | 0.632                   | 0.811                  |
| Data; restraints; parameters                 | 7714; 1; 334           | 5712; 1; 334          | 6267; 1; 334            | 7208; 1; 334           |
| $R_1, wR_2$ ( $I > 2\sigma(I)$ )             | 0.0412, 0.1017         | 0.0335, 0.0757        | 0.0299, 0.0802          | 0.0326, 0.0832         |
| $R_1, wR_2$ (all data)                       | 0.0584, 0.1116         | 0.0557, 0.0845        | 0.0325, 0.0819          | 0.0365, 0.0863         |
| Largest diff. peak/hole [ $e\text{Å}^{-3}$ ] | 1.722/ -1.151          | 0.925/ -1.166         | 1.210/ -0.618           | 2.221/ -0.690          |
| Flack parameter                              | 0.30(4)                | 0.71(5)               | 0.94(3)                 | 0.30(3)                |

Table S2.8: Unit cell metrics, selected crystallographic data and refinement statistics for synchrotron experiments – part 2.

|                                              | $C_{15}H_{22}AuOP$     |                       |                         |                        |
|----------------------------------------------|------------------------|-----------------------|-------------------------|------------------------|
| Empirical formula                            | $C_{15}H_{22}AuOP$     |                       |                         |                        |
| Formula weight [ $\frac{g}{mol}$ ]           | 446.26                 |                       |                         |                        |
| Temperature [K]                              | 293(2)                 |                       |                         |                        |
| Pressure [GPa]                               | 1.80                   |                       |                         |                        |
| Opening angle [°]                            | 39                     |                       |                         |                        |
| Identification code                          | 0006_1p80GPa           | 0007_1p80GPa          | 0008_1p80GPa            | 0009_1p80GPa           |
| Crystal system                               | orthorhombic           | orthorhombic          | orthorhombic            | orthorhombic           |
| Space group                                  | $Pb2_1a$               | $Pb2_1a$              | $Pb2_1a$                | $Pb2_1a$               |
| a [Å]                                        | 16.9414(8)             | 16.9382(13)           | 16.9319(3)              | 16.9299(3)             |
| b [Å]                                        | 9.8439(2)              | 9.83503(15)           | 9.83974(8)              | 9.84107(14)            |
| c [Å]                                        | 16.6593(5)             | 16.6637(2)            | 16.6583(5)              | 16.6630(3)             |
| $\alpha, \beta, \gamma$ [°]                  | 90, 90, 90             | 90, 90, 90            | 90, 90, 90              | 90, 90, 90             |
| Volume [Å <sup>3</sup> ]                     | 2778.27(17)            | 2776.0(2)             | 2775.36(9)              | 2776.20(8)             |
| Z                                            | 8                      | 8                     | 8                       | 8                      |
| $\rho_{calc}$ [ $\frac{g}{cm^3}$ ]           | 2.134                  | 2.136                 | 2.136                   | 2.135                  |
| $\mu$ [ $mm^{-1}$ ]                          | 2.601                  | 2.603                 | 2.604                   | 2.603                  |
| F(000)                                       | 1712                   | 1712                  | 1712                    | 1712                   |
| Crystal size [ $mm^3$ ]                      | 0.002 x 0.0015 x 0.001 | 0.002 x 0.002 x 0.001 | 0.0025 x 0.002 x 0.0015 | 0.004 x 0.0015 x 0.001 |
| Radiation source                             | synchrotron            | synchrotron           | synchrotron             | synchrotron            |
| Radiation wavelength [Å]                     | 0.410                  | 0.410                 | 0.410                   | 0.410                  |
| $2\theta$ range                              | 3.1 to 43.338          | 3.924 to 43.602       | 3.1 to 43.296           | 3.114 to 43.1          |
| Reflections collected                        | 9295                   | 9876                  | 9975                    | 10302                  |
| $R_{int}$                                    | 0.0646                 | 0.0351                | 0.0347                  | 0.0249                 |
| Resolution [Å]                               | 0.5552                 | 0.5520                | 0.5557                  | 0.5581                 |
| Completeness                                 | 0.757                  | 0.609                 | 0.631                   | 0.808                  |
| Data; restraints; parameters                 | 7228; 1; 334           | 5867; 1; 334          | 6181; 1; 334            | 7103; 1; 334           |
| $R_1, wR_2$ ( $I > 2\sigma(I)$ )             | 0.0728, 0.1895         | 0.0368, 0.0873        | 0.0301, 0.0802          | 0.0322, 0.0811         |
| $R_1, wR_2$ (all data)                       | 0.1044, 0.2095         | 0.0500, 0.0928        | 0.0329, 0.0821          | 0.0366, 0.0840         |
| Largest diff. peak/hole [ $e\text{Å}^{-3}$ ] | 2.618/ -2.175          | 1.104/ -0.599         | 1.370/ -0.671           | 2.346/ -0.671          |
| Flack parameter                              | 0.68(7)                | 0.63(4)               | 0.10(3)                 | 0.59(3)                |

Table S2.9: Unit cell metrics, selected crystallographic data and refinement statistics for synchrotron experiments – part 3.

|                                              | <i>C<sub>15</sub>H<sub>22</sub>AuOP</i> |                         |                         |                        |
|----------------------------------------------|-----------------------------------------|-------------------------|-------------------------|------------------------|
| Empirical formula                            | <i>C<sub>15</sub>H<sub>22</sub>AuOP</i> |                         |                         |                        |
| Formula weight [ $\frac{g}{mol}$ ]           | 446.26                                  |                         |                         |                        |
| Temperature [K]                              | 293(2)                                  |                         |                         |                        |
| Pressure [GPa]                               | 2.16                                    |                         |                         |                        |
| Opening angle [°]                            | 39                                      |                         |                         |                        |
| Identification code                          | 0010_2p16GPa                            | 0011_2p16GPa            | 0012_2p16GPa            | 0013_2p16GPa           |
| Crystal system                               | orthorhombic                            | orthorhombic            | orthorhombic            | orthorhombic           |
| Space group                                  | <i>Pbca</i>                             | <i>Pb2<sub>1</sub>a</i> | <i>Pbca</i>             | <i>Pbca</i>            |
| a [Å]                                        | 16.8614(15)                             | 16.7860(17)             | 16.8809(4)              | 16.8830(3)             |
| b [Å]                                        | 9.8359(4)                               | 9.80510(19)             | 9.84471(12)             | 9.85238(17)            |
| c [Å]                                        | 16.3043(9)                              | 16.5696(3)              | 16.2781(8)              | 16.2916(4)             |
| $\alpha, \beta, \gamma$ [°]                  | 90, 90, 90                              | 90, 90, 90              | 90, 90, 90              | 90, 90, 90             |
| Volume [Å <sup>3</sup> ]                     | 2704.0(3)                               | 2727.2(3)               | 2705.21(14)             | 2709.90(9)             |
| Z                                            | 8                                       | 8                       | 8                       | 8                      |
| $\rho_{calc}$ [ $\frac{g}{cm^3}$ ]           | 2.192                                   | 2.174                   | 2.191                   | 2.188                  |
| $\mu$ [ $mm^{-1}$ ]                          | 2.672                                   | 2.650                   | 2.671                   | 2.666                  |
| F(000)                                       | 1712                                    | 1712                    | 1712                    | 1712                   |
| Crystal size [ $mm^3$ ]                      | 0.002 x 0.0015 x 0.001                  | 0.002 x 0.002 x 0.001   | 0.0025 x 0.002 x 0.0015 | 0.004 x 0.0015 x 0.001 |
| Radiation source                             | synchrotron                             |                         |                         |                        |
| Radiation wavelength [Å]                     | 0.410                                   |                         |                         |                        |
| $2\theta$ range                              | 3.118 to 43.406                         | 3.948 to 43.334         | 3.116 to 43.384         | 3.202 to 43.576        |
| Reflections collected                        | 9095                                    | 9573                    | 9689                    | 9605                   |
| $R_{int}$                                    | 0.1302                                  | 0.0410                  | 0.0318                  | 0.0373                 |
| Resolution [Å]                               | 0.5544                                  | 0.5552                  | 0.5546                  | 0.5523                 |
| Completeness                                 | 0.823                                   | 0.612                   | 0.656                   | 0.817                  |
| Data; restraints; parameters                 | 4454; 0; 167                            | 5763; 49; 334           | 3652; 0; 167            | 4272; 0; 167           |
| $R_1, wR_2$ ( $I > 2\sigma(I)$ )             | 0.1214, 0.3105                          | 0.0488, 0.1240          | 0.0309, 0.0870          | 0.0419, 0.1153         |
| $R_1, wR_2$ (all data)                       | 0.1884, 0.3593                          | 0.0721, 0.1351          | 0.0367, 0.0900          | 0.0520, 0.1217         |
| Largest diff. peak/hole [ $e\text{Å}^{-3}$ ] | 3.142/-3.500                            | 1.672/-1.079            | 1.501/-0.640            | 1.617/-2.294           |
| Flack parameter                              | –                                       | 0.58(6)                 | –                       | –                      |

Table S2.10: Unit cell metrics, selected crystallographic data and refinement statistics for synchrotron experiments – part 4.

|                                              | <i>C<sub>15</sub>H<sub>22</sub>AuOP</i> |                       |                         |                        |
|----------------------------------------------|-----------------------------------------|-----------------------|-------------------------|------------------------|
| Empirical formula                            | <i>C<sub>15</sub>H<sub>22</sub>AuOP</i> |                       |                         |                        |
| Formula weight [ $\frac{g}{mol}$ ]           | 446.26                                  |                       |                         |                        |
| Temperature [K]                              | 293(2)                                  |                       |                         |                        |
| Pressure [GPa]                               | 2.66                                    |                       |                         |                        |
| Opening angle [°]                            | 39                                      |                       |                         | 38                     |
| Identification code                          | 0013a_2p66GPa                           | 0014_2p66GPa          | 0015_2p66GPa            | 0016_2p66GPa           |
| Crystal system                               | orthorhombic                            | orthorhombic          | orthorhombic            | orthorhombic           |
| Space group                                  | <i>Pbca</i>                             | <i>Pbca</i>           | <i>Pbca</i>             | <i>Pbca</i>            |
| a [Å]                                        | 16.7535(5)                              | 16.758(2)             | 16.7442(3)              | 16.7395(3)             |
| b [Å]                                        | 9.80417(16)                             | 9.8015(2)             | 9.80349(10)             | 9.79915(17)            |
| c [Å]                                        | 16.1656(3)                              | 16.1729(3)            | 16.1545(6)              | 16.1723(3)             |
| $\alpha, \beta, \gamma$ [°]                  | 90, 90, 90                              | 90, 90, 90            | 90, 90, 90              | 90, 90, 90             |
| Volume [Å <sup>3</sup> ]                     | 2655.27(10)                             | 2656.5(4)             | 2651.79(11)             | 2652.79(9)             |
| Z                                            | 8                                       | 8                     | 8                       | 8                      |
| $\rho_{calc}$ [ $\frac{g}{cm^3}$ ]           | 2.233                                   | 2.232                 | 2.236                   | 2.235                  |
| $\mu$ [ $mm^{-1}$ ]                          | 2.721                                   | 2.720                 | 2.725                   | 2.724                  |
| F(000)                                       | 1712                                    | 1712                  | 1712                    | 1712                   |
| Crystal size [ $mm^3$ ]                      | 0.002 x 0.0015 x 0.001                  | 0.002 x 0.002 x 0.001 | 0.0025 x 0.002 x 0.0015 | 0.004 x 0.0015 x 0.001 |
| Radiation source                             | synchrotron                             |                       |                         |                        |
| Radiation wavelength [Å]                     | 0.410                                   |                       |                         |                        |
| $2\theta$ range                              | 3.134 to 43.17                          | 3.226 to 42.982       | 3.134 to 43.468         | 3.226 to 43.276        |
| Reflections collected                        | 9397                                    | 8143                  | 9105                    | 9292                   |
| $R_{int}$                                    | 0.0385                                  | 0.0635                | 0.0474                  | 0.0445                 |
| Resolution [Å]                               | 0.5572                                  | 0.5596                | 0.5536                  | 0.5559                 |
| Completeness                                 | 0.829                                   | 0.602                 | 0.608                   | 0.806                  |
| Data; restraints; parameters                 | 4402; 0; 167                            | 3213; 66; 167         | 3181; 0; 167            | 4033; 0; 167           |
| $R_1, wR_2$ ( $I > 2\sigma(I)$ )             | 0.0313, 0.0825                          | 0.0718, 0.1814        | 0.0466, 0.1193          | 0.0420, 0.1340         |
| $R_1, wR_2$ (all data)                       | 0.0450, 0.0896                          | 0.0923, 0.1944        | 0.0540, 0.1256          | 0.0495, 0.1417         |
| Largest diff. peak/hole [ $e\text{Å}^{-3}$ ] | 1.196/-1.288                            | 3.949/-3.077          | 2.831/-2.362            | 2.859/-2.323           |
| Flack parameter                              | –                                       | –                     | –                       | –                      |

Table S2.11: Unit cell metrics, selected crystallographic data and refinement statistics for synchrotron experiments – part 5.

|                                              | <i>C</i> <sub>15</sub> <i>H</i> <sub>22</sub> <i>AuOP</i> |    |                         |
|----------------------------------------------|-----------------------------------------------------------|----|-------------------------|
| Empirical formula                            | <i>C</i> <sub>15</sub> <i>H</i> <sub>22</sub> <i>AuOP</i> |    |                         |
| Formula weight [ $\frac{g}{mol}$ ]           | 446.26                                                    |    |                         |
| Temperature [K]                              | 293(2)                                                    |    |                         |
| Pressure [GPa]                               | 3.30                                                      |    |                         |
| Opening angle [°]                            |                                                           |    |                         |
| Identification code                          | 0017_3p30GPa                                              | 38 | 0019_3p30GPa            |
| Crystal system                               | orthorhombic                                              |    | orthorhombic            |
| Space group                                  | <i>Pbca</i>                                               |    | <i>Pbca</i>             |
| a [Å]                                        | 16.5856(7)                                                |    | 16.5789(3)              |
| b [Å]                                        | 9.7494(2)                                                 |    | 9.75229(9)              |
| c [Å]                                        | 16.0285(4)                                                |    | 16.0089(5)              |
| $\alpha, \beta, \gamma$ [°]                  | 90, 90, 90                                                |    | 90, 90, 90              |
| Volume [Å <sup>3</sup> ]                     | 2591.80(13)                                               |    | 2588.35(10)             |
| Z                                            | 8                                                         |    | 8                       |
| $\rho_{calc}$ [ $\frac{g}{cm^3}$ ]           | 2.287                                                     |    | 2.290                   |
| $\mu$ [ $mm^{-1}$ ]                          | 2.788                                                     |    | 2.792                   |
| F(000)                                       | 1712                                                      |    | 1712                    |
| Crystal size [ $mm^3$ ]                      | 0.002 x 0.0015 x 0.001                                    |    | 0.0025 x 0.002 x 0.0015 |
| Radiation source                             | synchrotron                                               |    | synchrotron             |
| Radiation wavelength [Å]                     | 0.410                                                     |    | 0.410                   |
| $2\theta$ range                              | 3.998 to 43.15                                            |    | 3.156 to 43.398         |
| Reflections collected                        | 8880                                                      |    | 8771                    |
| $R_{int}$                                    | 0.0479                                                    |    | 0.0321                  |
| Resolution [Å]                               | 0.5575                                                    |    | 0.5545                  |
| Completeness                                 | 0.811                                                     |    | 0.622                   |
| Data; restraints; parameters                 | 4215; 0; 167                                              |    | 3220; 0; 167            |
| $R_1, wR_2$ ( $I > 2\sigma(I)$ )             | 0.0363, 0.0784                                            |    | 0.0234, 0.0627          |
| $R_1, wR_2$ (all data)                       | 0.0638, 0.0862                                            |    | 0.0264, 0.0645          |
| Largest diff. peak/hole [ $e\text{Å}^{-3}$ ] | 1.177/-1.120                                              |    | 0.731/-0.860            |
| Flack parameter                              | –                                                         |    | –                       |
|                                              |                                                           |    | 39                      |
|                                              |                                                           |    | 0021_3p30GPa            |
|                                              |                                                           |    | orthorhombic            |
|                                              |                                                           |    | <i>Pbca</i>             |
|                                              |                                                           |    | 16.5751(3)              |
|                                              |                                                           |    | 9.7432(2)               |
|                                              |                                                           |    | 16.0297(3)              |
|                                              |                                                           |    | 90, 90, 90              |
|                                              |                                                           |    | 2588.71(9)              |
|                                              |                                                           |    | 8                       |
|                                              |                                                           |    | 2.290                   |
|                                              |                                                           |    | 2.791                   |
|                                              |                                                           |    | 1712                    |
|                                              |                                                           |    | 0.004 x 0.0015 x 0.001  |
|                                              |                                                           |    | synchrotron             |
|                                              |                                                           |    | 0.410                   |
|                                              |                                                           |    | 3.256 to 43.53          |
|                                              |                                                           |    | 9352                    |
|                                              |                                                           |    | 0.0272                  |
|                                              |                                                           |    | 0.5529                  |
|                                              |                                                           |    | 0.825                   |
|                                              |                                                           |    | 4079; 0; 167            |
|                                              |                                                           |    | 0.0321, 0.0946          |
|                                              |                                                           |    | 0.0397, 0.1010          |
|                                              |                                                           |    | 2.768/-2.263            |

## S2.5 Merging results

Merging datasets from high-pressure experiments enable achieving better reciprocal space coverage and data completeness. It is important to merge datasets from the same conditions. In this purpose, four crystal specimens were placed in one DAC (Figure S2.12). Merging results are shown in Table S2.12. At 2.16 GPa two different merging processes were proceeded. First – for crystals B and C – in  $Pb2_1a$  space group. It was original space group (based on systematic extinctions) only for crystal B. Structure of crystal C was solved in lower-symmetry space group ( $Pb2_1a$  instead of  $Pbca$ ) to maintain same asymmetric unit and symmetry with data from crystal B. Second – for crystals C and D – in  $Pbca$  space group, which was original space group for both crystals. This first merging resulted in high-complete data, but with worse  $R_{merge}$  and non-solvable structure.

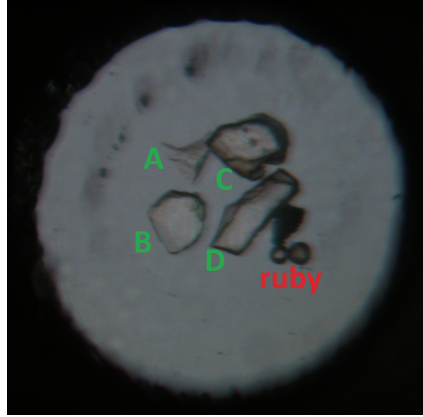

Figure S2.12: Crystal specimens in DAC for synchrotron measurements.

Table S2.12: Merging results for synchrotron datasets.

| Pressure [GPa]<br>(Space group) | Input     |           |              | Output |             |              |
|---------------------------------|-----------|-----------|--------------|--------|-------------|--------------|
|                                 | File      | $R_{int}$ | Completeness | File   | $R_{merge}$ | Completeness |
| 1.62<br>( $Pb2_1a$ )            | 0002 (A)  | 3.08%     | 80.8%        | p1m1   | 4.25%       | 95.3%        |
|                                 | 0003 (B)  | 3.26%     | 60.6%        |        |             |              |
|                                 | 0004 (C)  | 3.34%     | 63.2%        |        |             |              |
|                                 | 0005 (D)  | 2.54%     | 81.1%        |        |             |              |
| 1.80<br>( $Pb2_1a$ )            | 0006 (A)  | 6.46%     | 75.7%        | p2m1   | 5.13%       | 95.2%        |
|                                 | 0007 (B)  | 3.51%     | 60.9%        |        |             |              |
|                                 | 0008 (C)  | 3.47%     | 63.1%        |        |             |              |
|                                 | 0009 (D)  | 2.49%     | 80.8%        |        |             |              |
| 2.16<br>( $Pb2_1a$ )            | 0011 (B)  | 4.10%     | 61.2%        | p3m1   | 16.01%      | 90.0%        |
|                                 | 0012 (C)  | 2.91%     | 65.6%        |        |             |              |
| 2.16<br>( $Pbca$ )              | 0012 (C)  | 3.18%     | 65.6%        | p3m2   | 5.62%       | 87.6%        |
|                                 | 0013 (D)  | 3.73%     | 81.7%        |        |             |              |
| 2.66<br>( $Pbca$ )              | 0013a (A) | 3.85%     | 82.9%        | p4m1   | 5.85%       | 95.5%        |
|                                 | 0014 (B)  | 6.35%     | 60.2%        |        |             |              |
|                                 | 0015 (C)  | 4.74%     | 60.8%        |        |             |              |
|                                 | 0016 (D)  | 4.45%     | 80.6%        |        |             |              |
| 3.30<br>( $Pbca$ )              | 0017 (A)  | 4.79%     | 81.1%        | p5m1   | 5.40%       | 93.0%        |
|                                 | 0019 (C)  | 3.21%     | 62.2%        |        |             |              |
|                                 | 0021 (D)  | 2.72%     | 82.5%        |        |             |              |

Table S2.13: Unit cell metrics, selected crystallographic data and refinement statistics for merged datasets.

|                                             | <i>C<sub>15</sub>H<sub>22</sub>AuOP</i> |                         |                 |                 |                |
|---------------------------------------------|-----------------------------------------|-------------------------|-----------------|-----------------|----------------|
| Empirical formula                           | <i>C<sub>15</sub>H<sub>22</sub>AuOP</i> |                         |                 |                 |                |
| Formula weight [ $\frac{g}{mol}$ ]          | 446.26                                  |                         |                 |                 |                |
| Temperature [K]                             | 293(2)                                  |                         |                 |                 |                |
| Identification code                         | p1m1_1p62GPa                            | p2m1_1p80GPa            | p3m2_2p16GPa    | p4m1_2p66GPa    | p5m1_3p30GPa   |
| Pressure [GPa]                              | 1.62                                    | 1.8                     | 2.16            | 2.66            | 3.3            |
| Opening angle [°]                           | 39                                      | 39                      | 39              | 38              | 38             |
| Crystal system                              | orthorhombic                            | orthorhombic            | orthorhombic    | orthorhombic    | orthorhombic   |
| Space group                                 | <i>Pb2<sub>1</sub>a</i>                 | <i>Pb2<sub>1</sub>a</i> | <i>Pbca</i>     | <i>Pbca</i>     | <i>Pbca</i>    |
| a [Å]                                       | 17.0140(4)                              | 16.9414(8)              | 16.8830(3)      | 16.7395(3)      | 16.5856(7)     |
| b [Å]                                       | 9.85573(8)                              | 9.8439(2)               | 9.85238(17)     | 9.79915(17)     | 9.7494(2)      |
| c [Å]                                       | 16.71022(18)                            | 16.6593(5)              | 16.2916(4)      | 16.1723(3)      | 16.0285(4)     |
| $\alpha, \beta, \gamma$ [°]                 | 90, 90, 90                              | 90, 90, 90              | 90, 90, 90      | 90, 90, 90      | 90, 90, 90     |
| Volume [Å <sup>3</sup> ]                    | 2802.06(7)                              | 2778.27(17)             | 2709.90(9)      | 2652.79(9)      | 2591.80(13)    |
| Z                                           | 8                                       | 8                       | 8               | 8               | 8              |
| Radiation source                            | synchrotron                             | synchrotron             | synchrotron     | synchrotron     | synchrotron    |
| Radiation wavelength [Å]                    | 0.410                                   | 0.410                   | 0.410           | 0.410           | 0.410          |
| 2 $\theta$ range                            | 3.092 to 43.63                          | 3.1 to 43.386           | 3.114 to 43.576 | 3.134 to 43.466 | 3.158 to 43.53 |
| Reflections collected                       | 27326                                   | 26965                   | 20069           | 37626           | 28104          |
| $R_{int}$                                   | 0.0407                                  | 0.0524                  | 0.0562          | 0.0584          | 0.0540         |
| Resolution [Å]                              | 0.5517                                  | 0.5546                  | 0.5523          | 0.5536          | 0.5529         |
| Completeness                                | 0.953                                   | 0.952                   | 0.876           | 0.955           | 0.930          |
| Data; restraints; parameters                | 11909; 1; 334                           | 11834; 1; 334           | 4974; 0; 167    | 5873; 0; 167    | 5415; 0; 167   |
| $R_1, wR_2$ ( $I > 2\sigma(I)$ )            | 0.0307, 0.0722                          | 0.0357, 0.0769          | 0.0508, 0.1241  | 0.0509, 0.1082  | 0.0406, 0.0955 |
| $R_1, wR_2$ (all data)                      | 0.0429, 0.0756                          | 0.0482, 0.0842          | 0.0597, 0.1308  | 0.0606, 0.1135  | 0.0566, 0.1039 |
| Largest diff. peak/hole [eÅ <sup>-3</sup> ] | 1.996/-1.373                            | 2.360/-1.345            | 2.589/-2.063    | 1.620/-2.557    | 3.071/-1.499   |
| Flack parameter                             | 0.56(2)                                 | 0.46(3)                 | –               | –               | –              |



## S2.6 CCDC deposition numbers

Table S2.14: text

| Identification code | CCDC number | Identification code | CCDC number |
|---------------------|-------------|---------------------|-------------|
| appr0_1atm          | 2370910     | 0002_1p62GPa        | 2370902     |
| appr2_0p26GPa       | 2370856     | 0003_1p62GPa        | 2370904     |
| appr2_0p57GPa       | 2370854     | 0004_1p62GPa        | 2370903     |
| appr2_0p89GPa       | 2370859     | 0005_1p62GPa        | 2370909     |
| appr2_1p12GPa       | 2370855     | 0006_1p80GPa        | 2370908     |
| appr2_1p43GPa       | 2370857     | 0007_1p80GPa        | 2370906     |
| appr2_1p89GPa       | 2370858     | 0008_1p80GPa        | 2370907     |
| appr4_0p16GPa       | 2370873     | 0009_1p80GPa        | 2370905     |
| appr4_0p32GPa       | 2370878     | 0010_2p16GPa        | 2370917     |
| appr4_0p45GPa       | 2370874     | 0011_2p16GPa        | 2370919     |
| appr5_0p33GPa       | 2370876     | 0012_2p16GPa        | 2370916     |
| appr5_0p64GPa       | 2370877     | 0013_2p16GPa        | 2370920     |
| appr5_2p13GPa       | 2370875     | 0013a_2p66GPa       | 2370914     |
| appr6_0p58GPa       | 2370887     | 0014_2p66GPa        | 2370921     |
| appr6_0p94GPa       | 2370883     | 0015_2p66GPa        | 2370915     |
| appr6_1p64GPa       | 2370885     | 0016_2p66GPa        | 2370918     |
| appr6_1p94GPa       | 2370886     | 0017_3p30GPa        | 2370937     |
| appr6_2p31GPa       | 2370884     | 0019_3p30GPa        | 2370938     |
| appr6_2p59GPa       | 2370882     | 0021_3p30GPa        | 2370936     |

| Identification code | CCDC number |
|---------------------|-------------|
| p1m1_1p62GPa        | 2370943     |
| p2m1_1p80GPa        | 2370939     |
| p3m2_2p16GPa        | 2370941     |
| p4m1_2p66GPa        | 2370942     |
| p5m1_3p30GPa        | 2370940     |

### S3 Photoluminescence and its variability at increased pressure

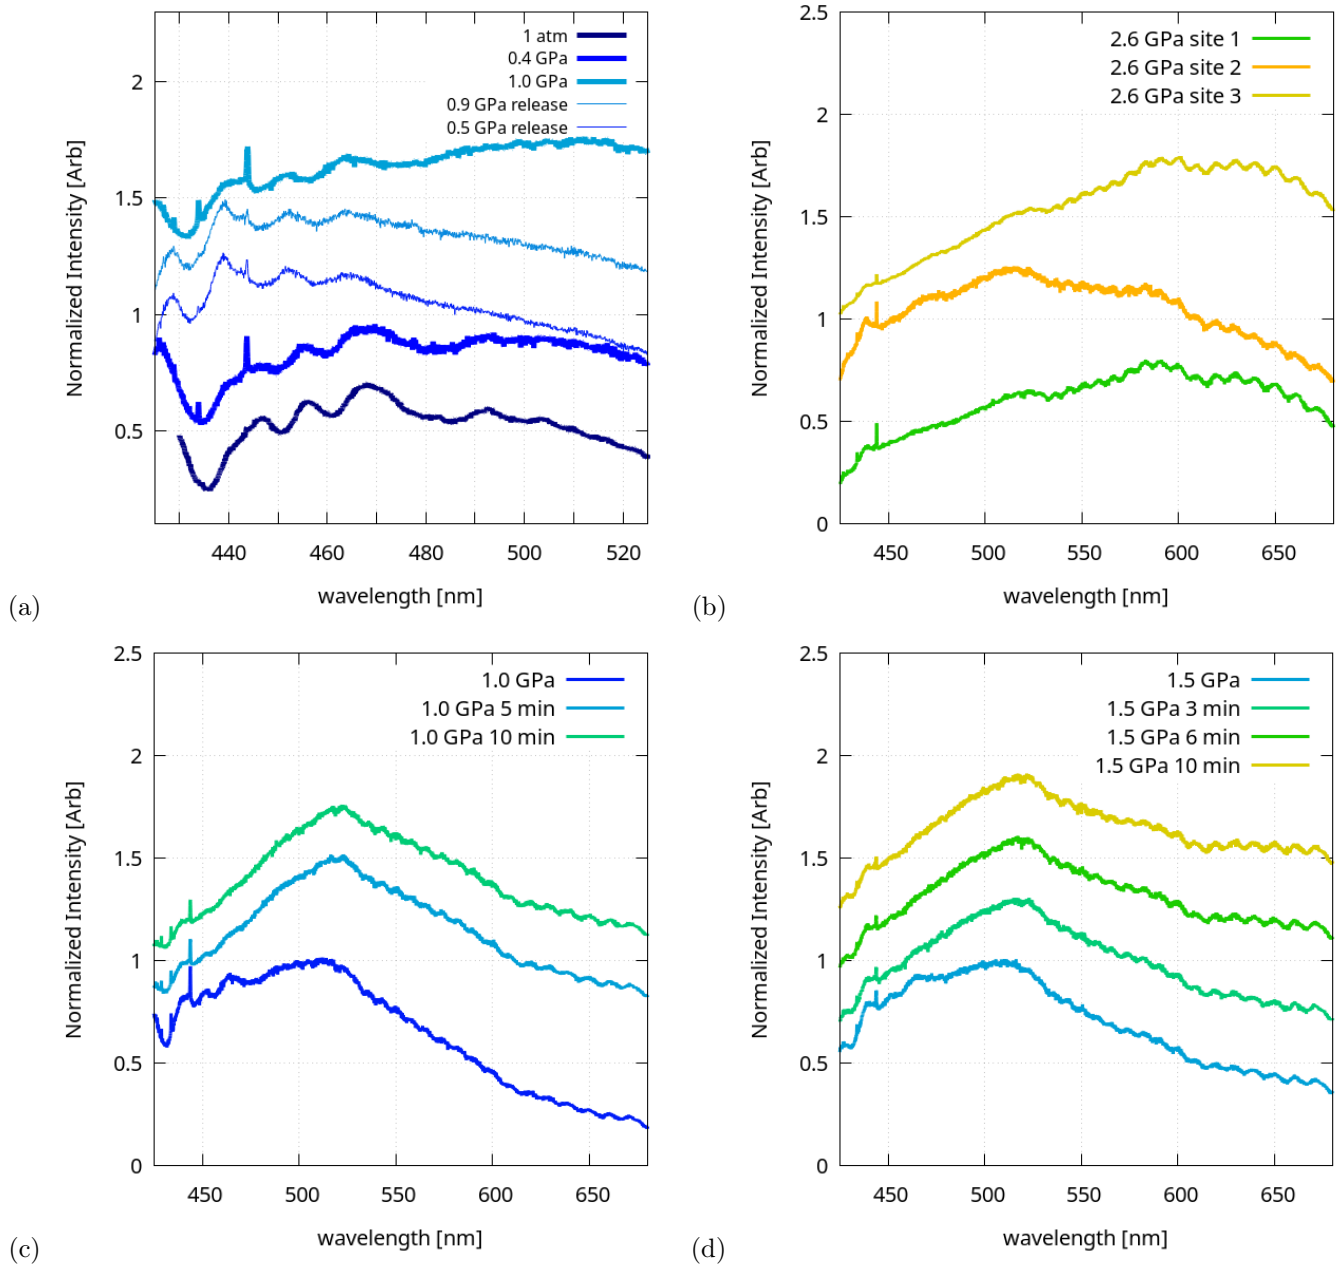

Figure S3.13: Fluorescence spectra of single crystal of **ArPEt** placed inside a DAC in n-pentane:i-pentane mixture and their variability (a) with pressure in low-pressure range; (b) with three different sites on the single-crystal face at 2.6 GPa; (c,d) at several time-delays after pressure increase to 1.0 GPa and 1.5 GPa accordingly. Presence of the phase **ArPEt-III** at 2.6 GPa has been confirmed by SCXRD experiment. The colors chosen arbitrarily to differentiate between the spectra. Persistent spike at 444 nm represents the Raman peak of the diamonds in a DAC. All spectra were normalized to their maximum value and plotted with increments along the vertical axis for clarity.

## S4 Phase transitions

### S4.1 Disorder below 0.5 GPa

**ArPEt-I** phase was obtained in pressure range from atmospheric up to about 0.5 GPa. All structures are disordered with percentage of second conformer showed in Table S4.15. For series 1 and 3 contribution was initially lower than for 2. Importantly, screening and pre-experiment for crystal of 2 series was performed at 100K instead of 300K. Impact of temperature on second conformer contribution will be studied in detail in future. For now, results suggest that mainly conformer with **C** triethylphosphine conformation takes part in first phase transition.

Table S4.15: Contribution of second conformer (with **F** triethylphosphine conformation) in **ArPEt-I** phase by measurement series.

| Series                            | 1 (appr2) | 3 (appr5) | 2 (appr4) |      |      |
|-----------------------------------|-----------|-----------|-----------|------|------|
| Pressure [GPa]                    | 0.26      | 0.33      | 0.16      | 0.32 | 0.45 |
| Second conformer contribution [%] | 29        | 25        | 42        | 35   | 27   |

### S4.2 Reciprocal layers

Phase transitions were confirmed by systematic extinctions on reciprocal layers. Some of them (near phase transition points) are shown below (Figure S4.14 – S4.16).

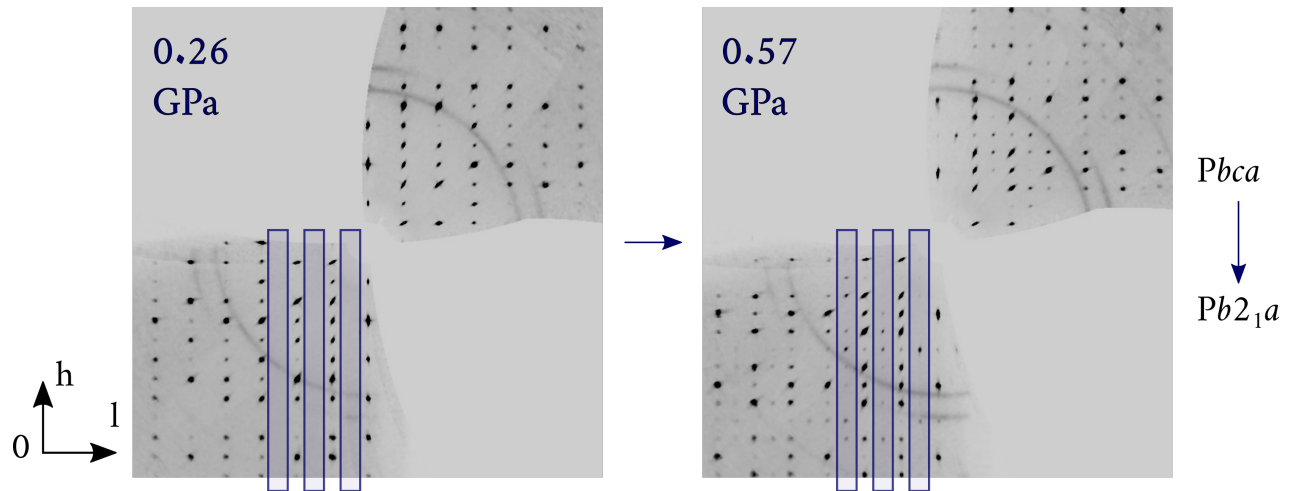

Figure S4.14: First phase transition analysis on layer  $h0l$  for series 1. Region where reflection from  $c_{[010]}$  glide plane should be extinct ( $l = 2n + 1$ ) is framed. Reflections in this region at 0.57 GPa confirms phase transformation  $Pbc1 \rightarrow Pbc2_1a$ .

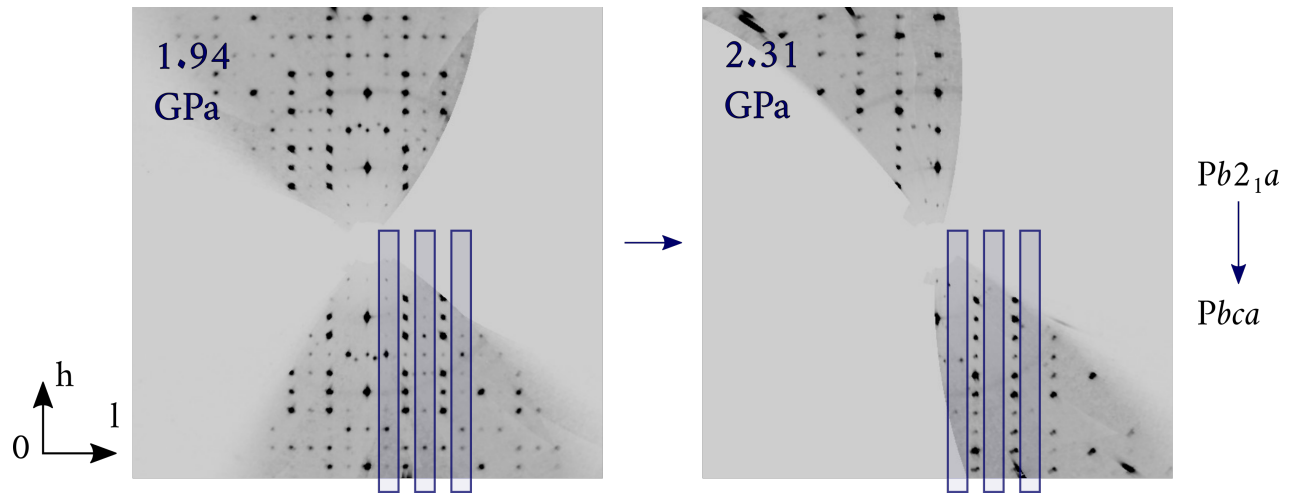

Figure S4.15: Second phase transition in quasi-hydrostatic medium analysis on layer  $h0l$  for series 4. Region where reflection from  $\mathbf{c}_{[010]}$  glide plane should be extinct ( $l = 2n + 1$ ) is framed. Lack of reflections in this region at 2.31 GPa confirms phase transformation  $Pb2_1a \rightarrow Pbca$ .

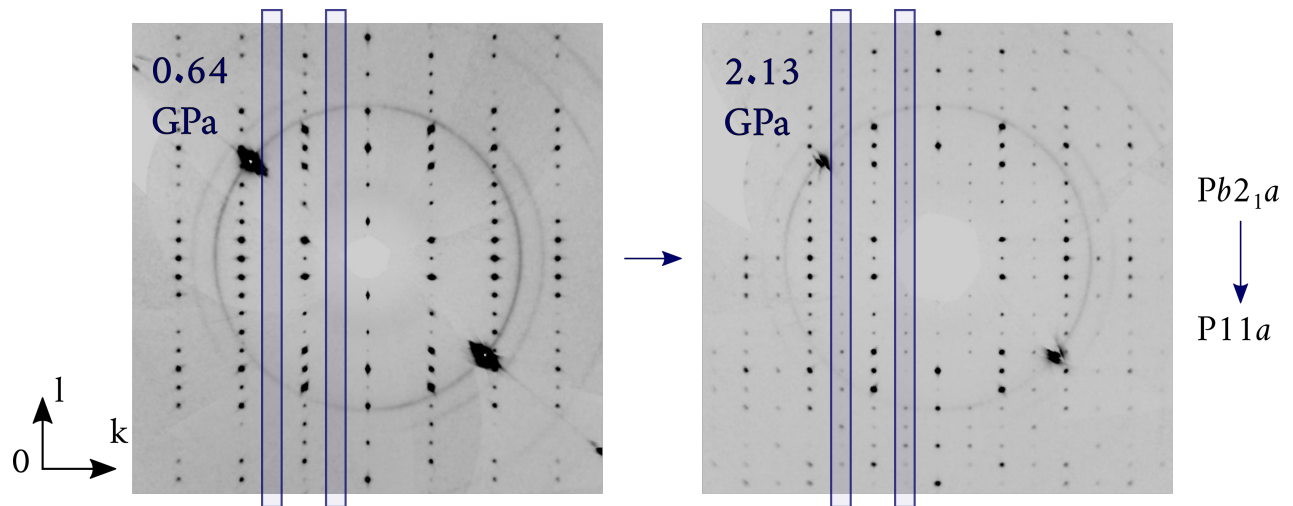

Figure S4.16: Second phase transition in non-hydrostatic medium analysis on layer  $0kl$  for series 3. Region where reflection from  $\mathbf{b}_{[100]}$  glide plane should be extinct ( $k = 2n + 1$ ) is framed. Lack of reflections in this region at 2.13 GPa confirms phase transformation  $Pb2_1a \rightarrow P11a$ .

## S4.3 Second phase transition analysis

### S4.3.1 *in-house* measurement

One data from *in-house* experiments for series 4 in quasi-hydrostatic medium turned out to be non-solvable both in  $Pbca$  and  $Pb2_1a$  space groups, even with many constrains and restrains. Synchrotron measurements reveal that this may be data from pressure transition point. Second phase transition in quasi-hydrostatic medium has been confirmed by analysis of systematic extinctions on  $h0l$  layer. For *in-house* data at 2.16 GPa there are no systematic extinctions from  $c_{[010]}$  glide plane, what suggest  $Pb2_1a$  space group (Figure S4.17). However, number and intensity of reflections conflicting  $c_{[010]}$  glide plane is lower than those values at lower pressure (Table S4.16). As the result, data represents intermediate state, unfortunately in quality not suitable for further analysis.

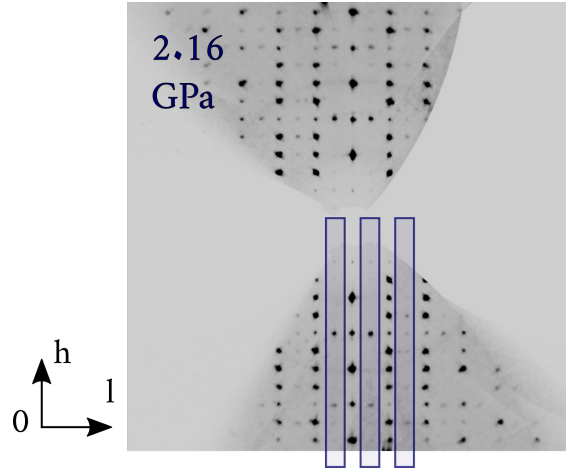

Figure S4.17: Layer  $h0l$  from *in-house* data at 2.16 GPa in quasi-hydrostatic medium. Region where reflection from  $c_{[010]}$  glide plane should be extinct ( $l = 2n + 1$ ) is framed. Reflections in this region confirms that phase transformation  $Pb2_1a \rightarrow Pbca$  didn't occur.

Table S4.16: Systematic absence expectations for pressure points near 2.16 GPa for series 4 (appr6).

|        | b --     |          |          | -- c --  |          |          |
|--------|----------|----------|----------|----------|----------|----------|
|        | 1.94 GPa | 2.16 GPa | 2.31 GPa | 1.94 GPa | 2.16 GPa | 2.31 GPa |
| N      | 178      | 171      | 160      | 431      | 407      | 241      |
| N I>3s | 0        | 0        | 1        | 231      | 121      | 18       |
| <I>    | 0.2      | 0.3      | 0.2      | 10.4     | 2.2      | 0.9      |
| <I/s>  | 0.2      | 0.2      | 0.2      | 5.1      | 2.0      | 0.9      |

### S4.3.2 Synchrotron measurement

Notably, not all crystal specimens investigated at the synchrotron exhibited identical behavior. One crystal did not undergo a  $Pb2_1a \rightarrow Pbca$  during the fast data collection series and displayed diffraction pattern indicative of higher symmetry only after further pressure increase (Figure 10).

## S5 Script for distances calculations

To calculate distances between atoms in structures, Daniel Tchoń's script in Python [Tchoń(2024)] was modified and used. Searched distances were determined from crystal structure (Figure S5.18). Then symmetry operations leading to achieving chosen atoms from asymmetric unit were analyzed (Table S5.17). Before preparing script it is crucial to ensure, that all structures from one phase have exactly the same asymmetric unit and numeration of atoms.

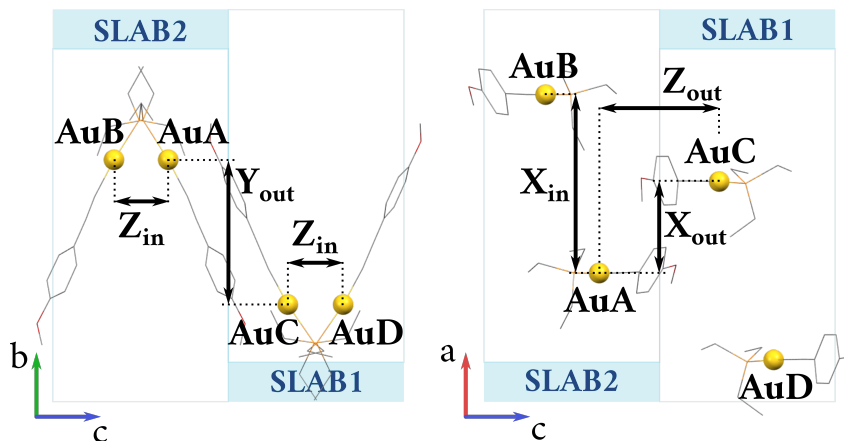

Figure S5.18: Definitions of distances inside and between SLABs with gold atoms names unification. Additionally,  $sum_{out}$  parameter was defined as summarized distance between atoms AuA and AuC. SLABs distinctions based on  $Pb2_1a$  space group. SLAB1 refers to molecules with conformation C, while SLAB2 – with conformation E of triethylphosphine moiety.

Table S5.17: Definitions of atoms AuA–AuD for all structures used in script. Symmetry operations for aryl moieties used in calculations were the same.

|          | AuA           | AuB                   | AuC                     | AuD                     |
|----------|---------------|-----------------------|-------------------------|-------------------------|
| $Pbca$   | Au1_(x, y, z) | Au1_(0.5+x, y, 0.5-z) | Au1_(1-x, 1-y, 1-z)     | Au1_(0.5-x, 1-y, 0.5+z) |
| $Pb2_1a$ | Au1_(x, y, z) | Au1_(0.5+x, y, -z)    | Au2_(x, y, z)           | Au2_(-0.5+x, y, 1-z)    |
| $P11a$   | Au1_(x, y, z) | Au1_(0.5+x, y, 1-z)   | Au4_(-0.5+x, -1+y, 1-z) | Au4_(x, -1+y, -1+z)     |
|          | Au3_(x, y, z) | Au3_(-0.5+x, y, 1-z)  | Au2_(0.5+x, y, 1-z)     | Au2_(x, y, -1+z)        |

For this work, calculations between neighboring gold atoms, distances between centers of neighboring aryl rings and angle between ring plane and **a** direction in the unit cell were calculated. Results are shown on Figures S5.19 and S5.20.

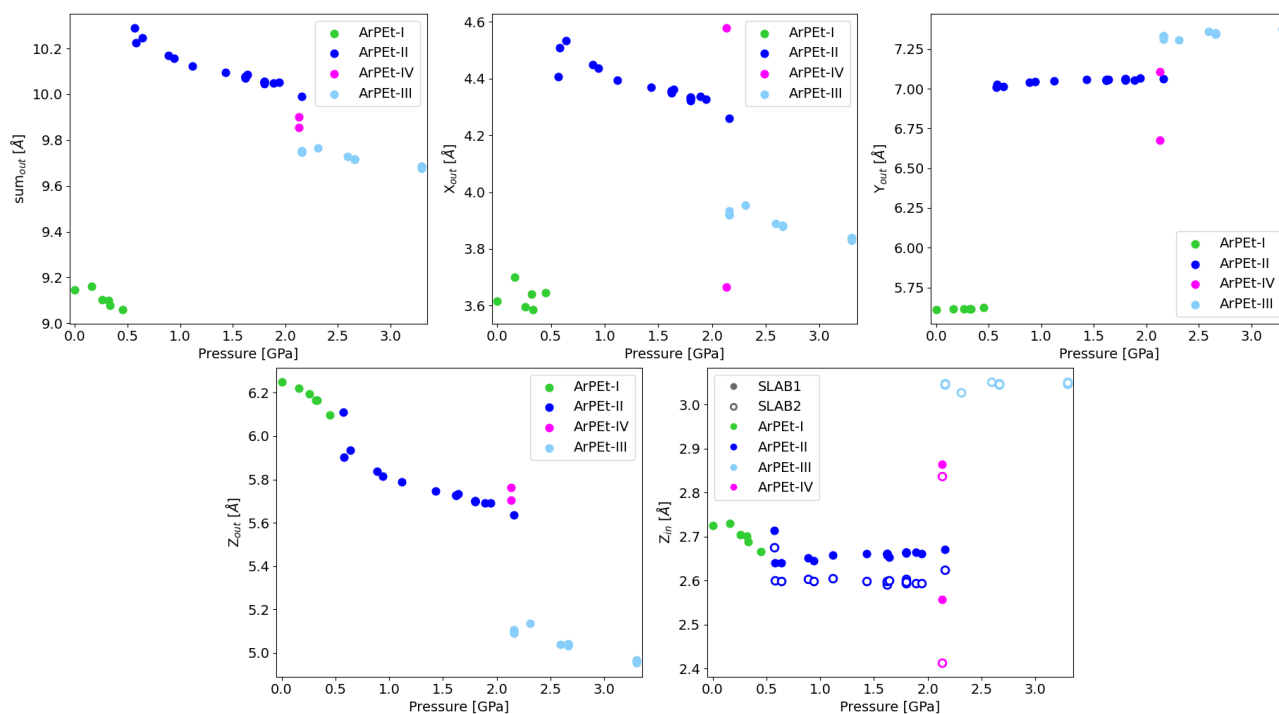

Figure S5.19: Calculated distances between neighboring gold atoms. Phases are distinguished by colors, while SLABs – by filling.

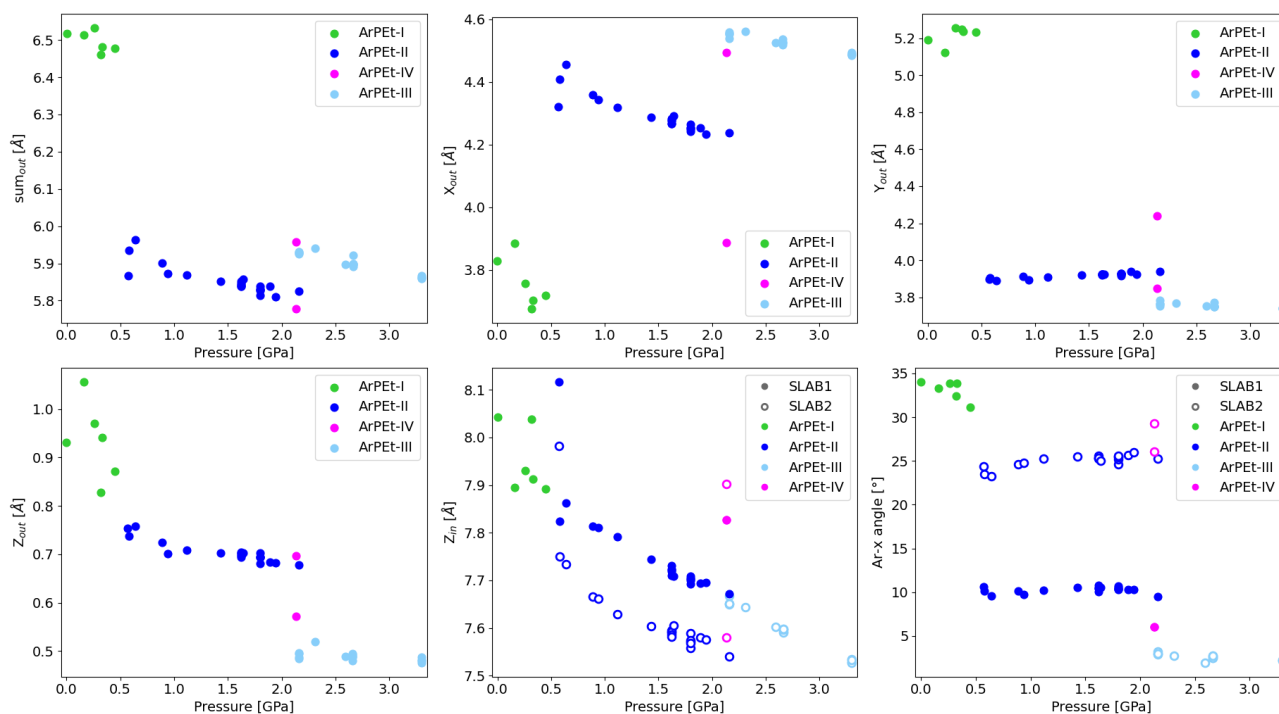

Figure S5.20: Calculated distances between neighboring gold aryl moieties and angle between aryl moieties and a direction in unit cell. Phases are distinguished by colors, while SLABs – by filling.

## S6 Theoretical calculations

### S6.1 Theoretical UV-vis spectrum of ArPEt in dichloromethane

Geometry of a single molecule of **ArPEt**, as taken from **ArPEt-I** crystal structure, was optimized using PCM approximation of the dichloromethane solvent in Gaussian16 [Frisch(2016)]. Calculations were performed using B3LYP/LANL2DZ method augmented with an empirical dispersion correction as proposed by Grimme [Grimme *et al.*(2010) Grimme, Antony, Ehrlich, Electronic excitations were calculated using time-dependent DFT method (TD-DFT) [Adamo and Jacquemin(2013)]. *Ab-initio* predicted UV-vis spectrum in dichloromethane agrees qualitatively with experimental results predicting absorption maximum at about 293 nm. Frontier orbitals are presented in Figure S6.21. The predicted  $S_0 \rightarrow S_1$  electronic excitation at 293 nm is essentially a Ligand to Metal charge transfer of  $\pi \rightarrow \pi^*$  type.

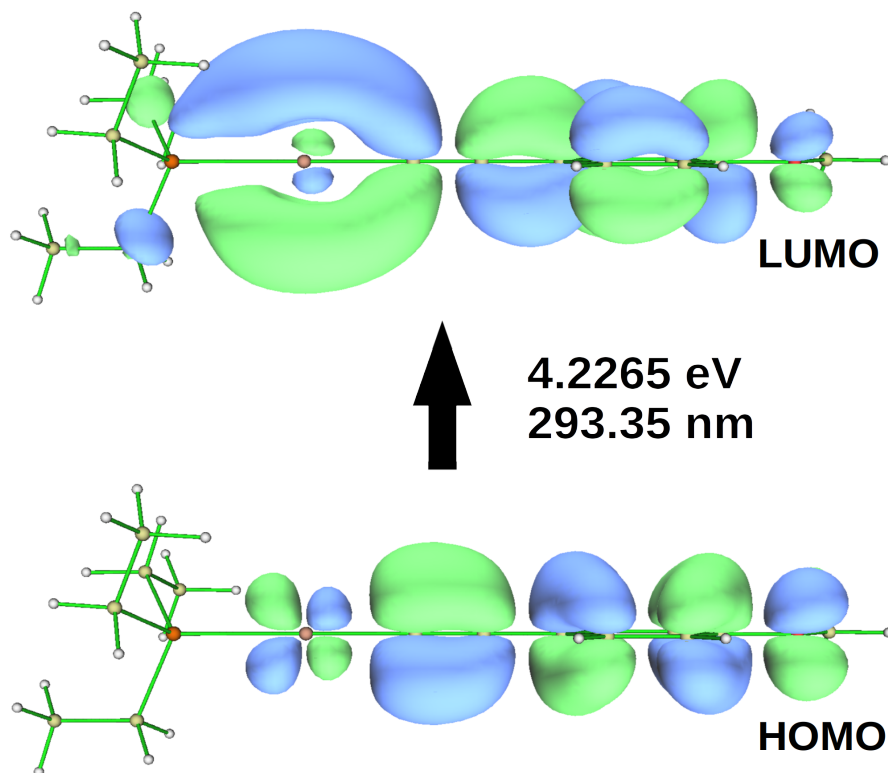

Figure S6.21: Representation of HOMO and LUMO frontier orbitals contributing to the  $S_0 \rightarrow S_1$  electronic excitation visualized with MultiWFN [Lu and Chen(2012), Lu(2024)];  $0.025 \text{ e}/\text{\AA}^3$  isosurfaces were used, blue - positive and green - negative.

### S6.2 Optimization of ArPEt crystal structures

Symmetry of each **ArPEt** polymorph was maintained during the optimization process. External pressures were set for high-pressure crystal phases. A full relaxation of both lattice parameters and atomic coordinates by means of analytical energy gradients was applied when possible. In the case of **ArPEt-II**, full relaxation of both lattice parameters and atomic coordinates did not converge within chosen strict criteria. Unit cell parameters obtained from XRD experiments differed from optimized ones by about 10%, for all **ArPEt** polymorphs. Cell volumes, obtained in last few cycles of not completely converged full relaxation of **ArPEt-II** don't differ one from another. Therefore, in the final optimization of lattice parameters and atomic coordinates of **ArPEt-II**, cell volume was constrained to the value from the former optimization.

The basis set, method and parameters used in the optimization of crystal structures, as well as, in the rest of theoretical calculations are listed in Table S6.18.



Table S6.18: Basis sets, method and parameters used in the theoretical calculations

|                     |                                                                                                                                                                 |
|---------------------|-----------------------------------------------------------------------------------------------------------------------------------------------------------------|
| Program             | CRYSTAL17 [Dovesi(2017)]                                                                                                                                        |
| Basis set: O, C, H, | 6-31d1_gatti [Gatti <i>et al.</i> (1994)Gatti, Saunders, and Roetti]                                                                                            |
| Basis set: Au       | Au_weihrich [Weihrich and Anusca(2006)]                                                                                                                         |
| Basis set: P        | P_85-21d1G_zicovich [Zicovich-Wilson <i>et al.</i> (2002)Zicovich-Wilson, Bert, Roetti, Dovesi, and Saunders]                                                   |
| method              | B3LYP-D* [Grimme <i>et al.</i> (2010)Grimme, Antony, Ehrlich, and Krieg]<br>[Civalleri <i>et al.</i> (2008)Civalleri, Zicovich-Wilson, Valenzano, and Ugliengo] |
| Shrinking factor    | 8                                                                                                                                                               |

### S6.3 Theoretical estimation of Birch-Murnaghan’s Equation of States - EOS

The variation of the crystal structures with pressure was theoretically simulated and fitted with the third-order Birch-Murnaghan’s Equation of States (EOSs) using CRYSTAL17 computer code. Starting geometries and all the parameters used in the calculations are shown in Table S6.19.

Table S6.19: Parameters used to simulate theoretical EOS

| EOS start geometry & Vopt | ArPET-I         | ArPET-II           | ArPET-III              |
|---------------------------|-----------------|--------------------|------------------------|
| EOS pressure range        | 0 GPa - 2.6 GPa | 0 GPa - 3.9 GPa    | 1.2 GPa- 4.5 GPa       |
| EOS volume range          | Vopt - 0.9Vopt  | 1.07Vopt - 0.9Vopt | 1.025Vopt - 0.9325Vopt |
| EOS optimization steps    | 8               | 8                  | 5                      |

## References

- [Tchoń and Makal(2021)] D. Tchoń and A. Makal, *IUCrJ*, 2021, **8**, 1006–1017.
- [Klotz *et al.*(2009)Klotz, Chervin, Munsch, and Le Marchand] S. Klotz, J.-C. Chervin, P. Munsch and G. Le Marchand, *Journal of Physics D: Applied Physics*, 2009, **42**, 075413.
- [Angel *et al.*(2007)Angel, Bujak, Zhao, Gatta, and Jacobsen] R. J. Angel, M. Bujak, J. Zhao, G. D. Gatta and S. D. Jacobsen, *Journal of Applied Crystallography*, 2007, **40**, 26–32.
- [Tchoń(2024)] D. Tchoń, *picometer*, *GitHub*, <https://github.com/Baharis/picometer>, 2024.
- [Frisch(2016)] M. J. Frisch, *Gaussian~16 Revision C.01*, 2016, G. W. Trucks and H. B. Schlegel and G. E. Scuseria and M. A. Robb and J. R. Cheeseman and G. Scalmani and V. Barone and G. A. Petersson and H. Nakatsuji and X. Li and M. Caricato and A. V. Marenich and J. Bloino and B. G. Janesko and R. Gomperts and B. Mennucci and H. P. Hratchian and J. V. Ortiz and A. F. Izmaylov and J. L. Sonnenberg and D. Williams-Young and F. Ding and F. Lipparini and F. Egidi and J. Goings and B. Peng and A. Petrone and T. Henderson and D. Ranasinghe and V. G. Zakrzewski and J. Gao and N. Rega and G. Zheng and W. Liang and M. Hada and M. Ehara and K. Toyota and R. Fukuda and J. Hasegawa and M. Ishida and T. Nakajima and Y. Honda and O. Kitao and H. Nakai and T. Vreven and K. Throssell and Montgomery, Jr., J. A. and J. E. Peralta and F. Ogliaro and M. J. Bearpark and J. J. Heyd and E. N. Brothers and K. N. Kudin and V. N. Staroverov and T. A. Keith and R. Kobayashi and J. Normand and K. Raghavachari and A. P. Rendell and J. C. Burant and S. S. Iyengar and J. Tomasi and M. Cossi and J. M. Millam and M. Klene and C. Adamo and R. Cammi and J. W. Ochterski and R. L. Martin and K. Morokuma and O. Farkas and J. B. Foresman and D. J. Fox.
- [Grimme *et al.*(2010)Grimme, Antony, Ehrlich, and Krieg] S. Grimme, J. Antony, S. Ehrlich and H. Krieg, *The Journal of Chemical Physics*, 2010, **132**, 154104.
- [Adamo and Jacquemin(2013)] C. Adamo and D. Jacquemin, *Chem. Soc. Rev.*, 2013, **42**, 845–856.
- [Lu and Chen(2012)] T. Lu and F. Chen, *Journal of Computational Chemistry*, 2012, **33**, 580–592.
- [Lu(2024)] T. Lu, *The Journal of Chemical Physics*, 2024, **161**, 082503.
- [Dovesi(2017)] Dovesi, *Saunders, Roetti, Orlando, Zicovich-Wilson, Pascale, Doll, Harrison, Bush, D’Arco, Lunell, Causà, Noël, Maschio, Erba, Casassa, Rerat, Michel CRYSTAL17 User’s Manual (University of Torino, Torino, 2017)*, 2017.

- [Gatti *et al.*(1994)Gatti, Saunders, and Roetti] C. Gatti, V. R. Saunders and C. Roetti, *The Journal of Chemical Physics*, 1994, **101**, 10686–10696.
- [Wehrich and Anusca(2006)] R. Wehrich and I. Anusca, *ChemInform*, 2006, **37**, year.
- [Zicovich-Wilson *et al.*(2002)Zicovich-Wilson, Bert, Roetti, Dovesi, and Saunders] C. M. Zicovich-Wilson, A. Bert, C. Roetti, R. Dovesi and V. R. Saunders, *The Journal of Chemical Physics*, 2002, **116**, 1120–1127.
- [Civalleri *et al.*(2008)Civalleri, Zicovich-Wilson, Valenzano, and Ugliengo] B. Civalleri, C. M. Zicovich-Wilson, L. Valenzano and P. Ugliengo, *CrystEngComm*, 2008, **10**, 405–410.
